# 1 **Pattern formation and bistability in a synthetic intercellular genetic toggle**

2

3 Bárbara de Freitas Magalhães<sup>1,5</sup>, Gaoyang Fan<sup>2,5</sup>, Eduardo Sontag<sup>3</sup>, Krešimir Josić<sup>2,\*</sup>, Matthew  
4 R. Bennett<sup>1,4,\*</sup>

5 1. Department of Biosciences, Rice University, Houston, TX, USA

6 2. Department of Mathematics, University of Houston, Houston, TX, USA

7 3. Department of Bioengineering, Department of Electrical and Computer Engineering,  
8 Northeastern University, Boston, MA, USA

9 4. Department of Bioengineering, Rice University, Houston, TX, USA

10 5. These authors contributed equally

11 \*Correspondence: [josic@math.uh.edu](mailto:josic@math.uh.edu); [matthew.bennett@rice.edu](mailto:matthew.bennett@rice.edu)

12

## 13 **Summary**

14

15 Differentiation within multicellular organisms is a complex process that helps to establish spatial  
16 patterning and tissue formation within the body. Often, the differentiation of cells is governed by  
17 morphogens and intercellular signaling molecules that guide the fate of each cell, frequently  
18 using toggle-like regulatory components. Synthetic biologists have long sought to recapitulate  
19 patterned differentiation with engineered cellular communities and various methods for  
20 differentiating bacteria have been invented. Here, we couple a synthetic co-repressive toggle  
21 switch with intercellular signaling pathways to create a “quorum-sensing toggle.” We show that  
22 this circuit not only exhibits population-wide bistability in a well-mixed liquid environment, but  
23 also generates patterns of differentiation in colonies grown on agar containing an externally  
24 supplied morphogen. If coupled to other metabolic processes, circuits such as the one  
25 described here would allow for the engineering of spatially patterned, differentiated bacteria for  
26 use in biomaterials and bioelectronics.

27

## 28 **Keywords**

29 Genetic toggle switch, quorum sensing, pattern formation, self-organization, synthetic biology.

30

## 31 **Introduction**

32 One goal of synthetic biology is the creation of engineered biological systems that can perform a  
33 wide variety of functions (Benner & Sismour, 2005; Cameron et al., 2014; Cheng & Lu, 2012;  
34 Church et al., 2014). Such systems could be used for various environmental, industrial, and

35 medical applications (Callura et al., 2012; Khalil & Collins, 2010; McCarty & Ledesma-Amaro,  
36 2019; Xia et al., 2019). However, synthetic biology is also advancing basic research by  
37 providing a bottom-up approach to understanding phenomena governed by nontrivial genetic  
38 regulatory mechanisms. This is done by creating and perturbing “synthetic gene circuits” in  
39 living systems that behave similarly to their natural counterparts and can thus serve as a model  
40 systems (Davies & Glykofrydis, 2020; Weisenberger & Deans, 2018).

41 As part of the ground up approach to basic research, synthetic biologists have long  
42 sought to use engineered cells to recapitulate spatial patterns seen in multicellular systems  
43 (Cachat et al., 2017; Davies & Glykofrydis, 2020; Grant et al., 2020; Kim et al., 2020; Santos-  
44 Moreno & Schaerli, 2018; Sekine et al., 2018). Many mechanisms have been proposed to  
45 explain the appearance of natural patterning, such as the reaction-diffusion model (Turing,  
46 1952) and the positional information model (or French flag model) (Wolpert, 1969). These  
47 mechanisms have been used as blueprints for synthetic analogs of biological patterns (Diambra  
48 et al., 2015; Karig et al., 2018a; Sekine et al., 2018). Scientists are also working towards self-  
49 organizing patterns (Cachat et al., 2017; Cao et al., 2016; Curatolo et al., 2020; Liu et al., 2011;  
50 Payne et al., 2013; Potvin-Trottier et al., 2016; Santos-Moreno & Schaerli, 2018) that use  
51 intercellular signals to regulate transcriptional activity (Cao et al., 2016; Curatolo et al., 2020; Liu  
52 et al., 2011; Payne et al., 2013).

53 Indeed, the circuit topology of the first synthetic gene circuit to be described, the “genetic  
54 toggle switch” (Gardner et al., 2000a), has also been implicated in spatial patterning. The toggle  
55 switch is comprised of just two repressors that regulate each other’s promoters – and it  
56 therefore has two possible transcriptional states corresponding to one active repressor gene,  
57 and the other repressed. Gene networks akin to the toggle switch are thought to help stabilize  
58 and refine spatial boundaries within differentiated populations because the two expression  
59 states of the toggle are generally mutually exclusive (Briscoe & Small, 2015). Toggle-like  
60 regulatory components are found throughout developmental processes, such as in the anterior-  
61 posterior development of the *Drosophila* blastoderm (Nasiadka et al., 2002; Struhl, 1989), and in  
62 the dorsal-ventral development of the vertebrate neural tube (Alaynick et al., 2011; Dessaud et  
63 al., 2008).

64 In multicellular systems, toggle switches can function independently. In the absence of  
65 any external signal (e.g., morphogens), the internal stochastic dynamics and bias of each cell  
66 determine the transcriptional states of the respective toggle switches. In other words, each cell  
67 randomly assumes one of the two states. However, in the presence of an external morphogen  
68 gradient, a distinct boundary is formed between cells in the two different transcriptional states.

69 This can occur if the toggle switch exhibits hysteresis (bistability) as a function of the  
70 morphogen.

71 Here, we built a version of the genetic toggle switch in *Escherichia coli* that uses  
72 intercellular signaling to reinforce each transcriptional state. For instance, if a cell is in the “ON”  
73 state it produces an intercellular signal that up-regulates the ON state in nearby cells. The  
74 addition of intercellular signaling to the toggle has been proposed as a means of creating a  
75 population-level toggle switch, allowing all cells in the population to simultaneously reside in one  
76 of the two possible transcriptional states (Nikolaev & Sontag, 2016). We experimentally confirm  
77 that, given the right conditions, this version of the toggle does exhibit population-level bistability  
78 in a well-mixed liquid culture. Additionally, we show that when grown on solid agar imbued with  
79 an exogenous morphogen, colonies of these cells form three dimensional patterns that are  
80 distinctly different from those observed in colonies of cells containing a traditional toggle switch  
81 lacking intercellular signaling. In particular, the addition of intercellular signaling creates a  
82 regime that enables a shift in the resulting pattern. We develop a mechanistic mathematical  
83 model of the system, to explain how degradation, diffusion, and sequestration of the signaling  
84 molecules and inducers determine the observed patterns.

85

## 86 **Results**

### 87 **General characteristics of QS and NQS toggles**

88 Here, we call the version of the toggle switch that includes intercellular signaling the “QS  
89 toggle”, as it uses refactored **q**uorum **s**ensing pathways to generate intercellular signals. The  
90 QS toggle is a version of the genetic toggle switch (Gardner et al., 2000a) that includes two  
91 repressors that repress each other's promoters (LacI and TetR). Additionally, it includes a  
92 reporter for each state (YFP and CFP). The circuit also includes two orthogonal QS pathways  
93 (CinR/I and RhIR/I) (Chen et al., 2015; Lithgow et al., 2000; Pesci et al., 1997) to produce the  
94 necessary intercellular signaling. A representation of the QS toggle's two fluorescent states is  
95 shown in Fig. 1A. For the yellow state to be active (Fig. 1A, left), LacI represses the promoters  
96 driving the expression of *tetR*, *cfp* and *rhII*. With *tetR* repressed, *cinI* is expressed, and its  
97 protein catalyzes the production of C14-HSL. When bound to the CinR transcription factor, C14-  
98 HSL activates the expression of *lacI* and *yfp*. Alternatively, for the blue state to be active (Fig.  
99 1A, right), TetR represses the promoters driving the expression of *lacI*, *yfp* and *cinI*. With *lacI*  
100 repressed, *rhII* is expressed, and its protein produces C4-HSL. When bound to the RhIR  
101 transcription factor, C4-HSL activates the expression of *tetR* and *cfp*. One can exogenously  
102 induce the yellow state by adding anhydrotetracycline (aTc), which will inactivate TetR (Fig. 1E).

103 Similarly, one can exogenously induce the blue state by adding isopropyl- $\beta$ -D-1-  
104 thiogalactopyranoside (IPTG), inactivating LacI (Fig. 1D). The QS toggle is unbalanced in the  
105 absence of inducers: it exhibited a preference to the blue state (Fig. 1D, E). We also found that  
106 this imbalance is dependent on the QS network (Fig. S2I, J). The interaction of the main circuit  
107 elements is summarized in Fig. 1C. The QS toggle topology (Fig. 1C, left) differs from the  
108 conventional (non-quorum sensing toggle or “NQS toggle”- Fig. 1C, right) topology by the  
109 presence of two QS networks, creating extra positive feedback loops. The NQS circuit includes  
110 the same repressors and reporter genes but driven by promoters that are only responsive to  
111 these repressors (Fig. 1B). The NQS toggle can also be tuned with IPTG and aTc (Fig. 1F and  
112 1G). For all experiments, we transformed the plasmid-borne QS and NQS circuits into *E. coli*  
113 cells that contained constitutively expressed *cinR* and *rhIR* in their genome.

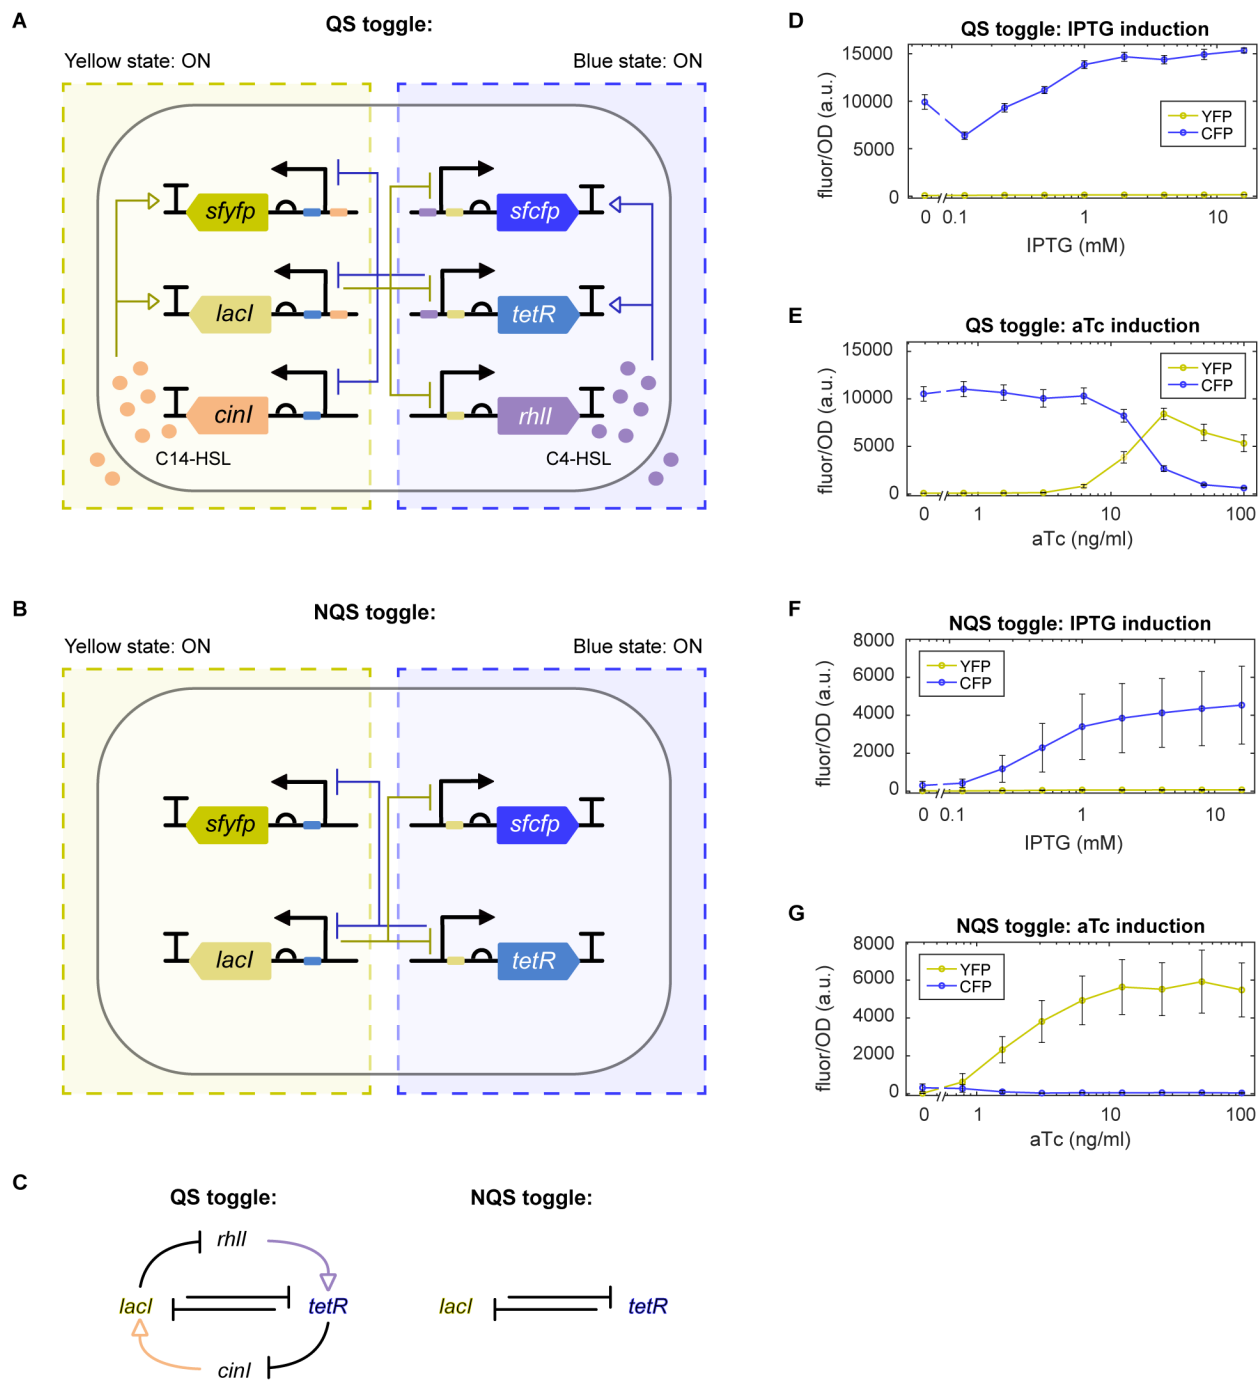

114  
 115 **Figure 1: QS and NQS toggle circuit design.** For both circuits, IPTG can induce the blue state, while aTc can  
 116 induce the yellow. **A)** QS toggle: When the yellow state is ON, Lacl represses *tetR*, *rhII* and *sfyfp* genes, while C14-  
 117 HSL activates *lacl* and *sfyfp* genes. When the blue state is ON, TetR represses *lacl*, *cinI* and *sfyfp* genes, while C4-  
 118 HSL activates *tetR* and *sfyfp* genes. **B)** NQS toggle: When the yellow state is ON, Lacl represses *tetR*, and *sfyfp*  
 119 genes. When the blue state is ON, TetR represses *lacl* and *sfyfp* genes. **C)** The QS and NQS toggle topologies differ  
 120 by the presence of 2 QS networks. **D)** QS toggle induction with IPTG in liquid culture. **E)** QS toggle induction with aTc  
 121 in liquid culture. **F)** NQS toggle induction with IPTG in liquid culture. **G)** NQS toggle induction with aTc in liquid

122 culture. Lines represent the average fluorescence and error bars represent the standard deviation of 3 technical  
123 replicates for 3 independent experiments.

124

125 We first checked whether cells containing the QS toggle exhibited population-level  
126 bistability. Genetic toggles are often bistable (Barbier et al., 2020; Gardner et al., 2000a;  
127 Lugagne et al., 2017; Wang et al., 2009), *i.e.* they can stably reside in either of two possible  
128 transcriptional states. To find the bistable region for both the QS and NQS toggles, we grew  
129 overnight cultures with either IPTG or aTc to allow for the populations to start in either state  
130 (blue or yellow, respectively). We then grew these cells in liquid culture using various  
131 combinations of IPTG and aTc concentrations and used flow cytometry to measure the CFP and  
132 YFP fluorescence of individual cells. After three hours, we observed that, when starting in the  
133 yellow state (*i.e.* previously grown in media with aTc), QS toggle cells all remained in the yellow  
134 state for all combinations of inducer (Fig. 2A, right). However, when starting in the blue state  
135 (*i.e.*, previously grown in media with IPTG), QS toggle populations shifted to the yellow state at  
136 sufficiently high aTc but remained in the blue state at lower concentrations (Fig. 2A, left).  
137 Importantly, we observed cultures in which all cells were either in the blue or yellow state  
138 depending on the starting condition and the inducer concentration (Fig. 2A) – indicating that the  
139 QS toggle is bistable at the population level in those conditions. Meanwhile, NQS toggle cells  
140 transitioned to blue and yellow, when starting from the opposite color initial conditions (Fig. 2B).  
141 We also observed that cells pre-induced with IPTG primarily did not show any fluorescence (Fig.  
142 2B, left), although the blue state was inducible. A third state (OFF), in which cells exhibited little  
143 to no fluorescence of either type, was more common within NQS cells. The NQS toggle was  
144 also bistable for some conditions. When growing the cells for 9 hours instead, the NQS toggle  
145 showed a decrease in both intensities in all tested conditions, while the QS toggle tended to  
146 show stronger fluorescence intensities (Fig. S1).

147

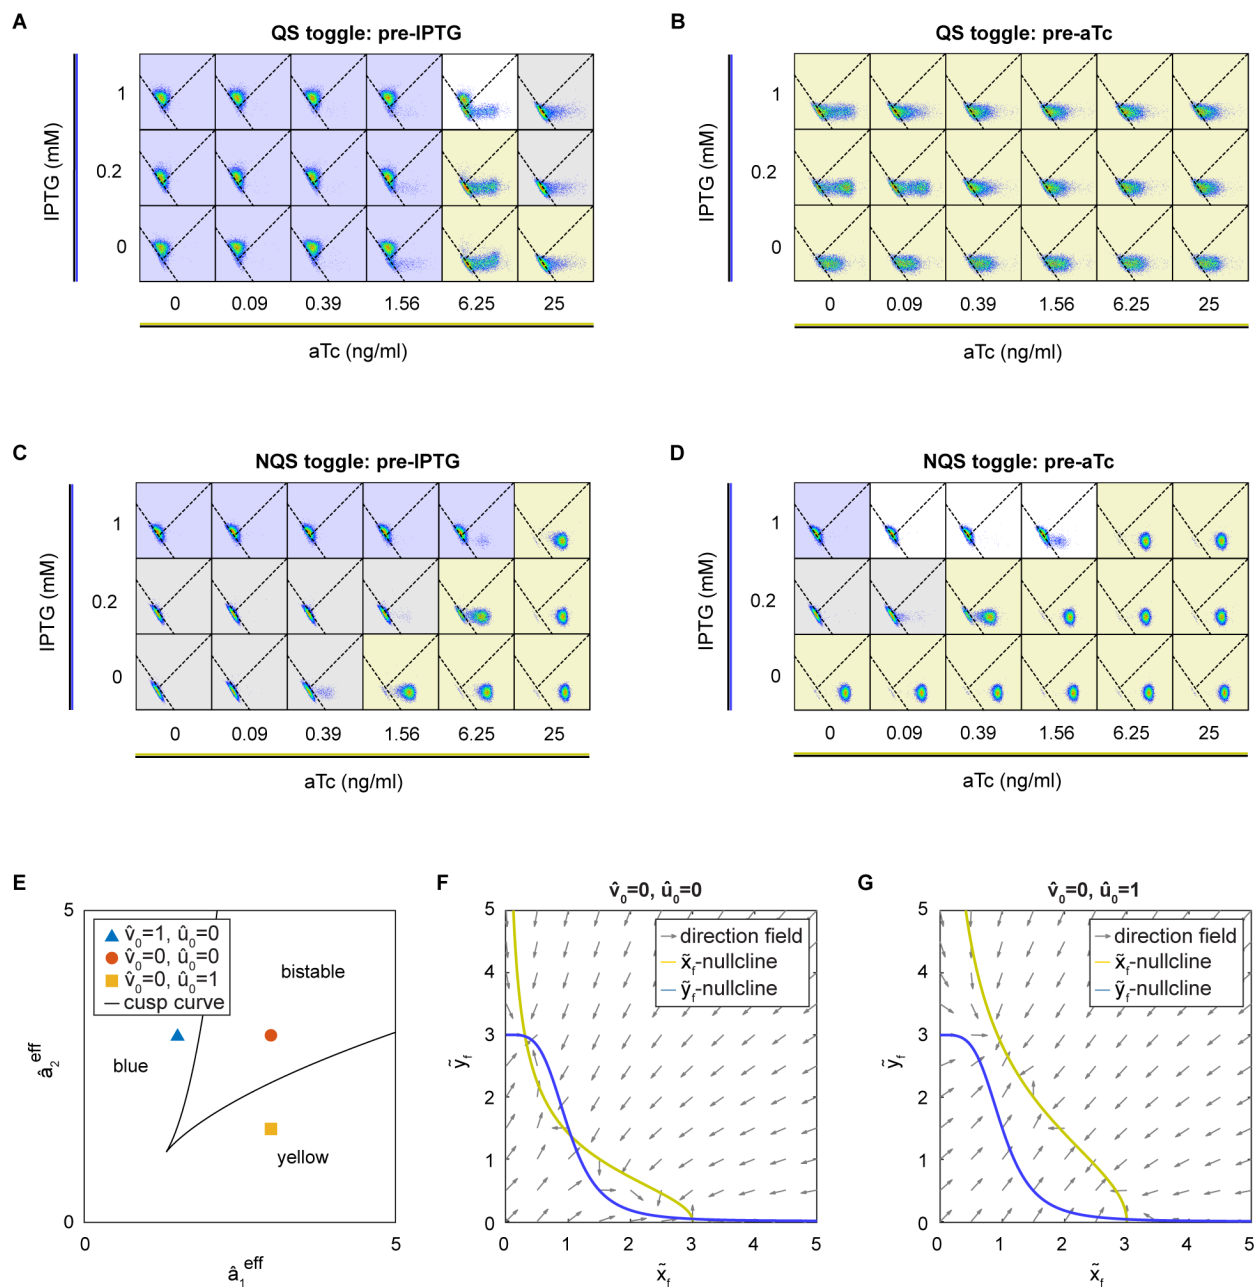

148  
 149 **Figure 2: Behavior of QS and NQS toggle cells when treated with a combination of inducers. A-B)** Flow  
 150 cytometry data of QS toggle cells that were pre-induced with either IPTG (A) or aTc (B). Each dot is a single cell  
 151 classified within a gate. Gates were determined with single color and double negative controls. Dashed lines in each  
 152 plot represent the boundaries between the three distinct gates, which represent cellular states: CFP+ (top gate),  
 153 YFP+ (bottom-right gate), and OFF (bottom-left gate). Background colors in each plot represent which state the  
 154 majority of cells are in (>50%): blue color indicates mostly CFP+ cells, yellow plots are mostly YFP+, gray plots are  
 155 mostly OFF, and white plots indicate cells that are present in multiple states (<50% each). **C, D)** Flow cytometry data  
 156 of NQS toggle cells that were pre-induced with either IPTG (C) or aTc (D). **E)** Bifurcation diagram of the QS toggle  
 157 system over the nondimensionalized parameters  $\hat{a}_1^{\text{eff}}$  and  $\hat{a}_2^{\text{eff}}$ , the effective promoter strength of the repressors. Here  
 158 we demonstrate a case where without exogenous inducers, aTc or IPTG, the system is bistable (red dot). Adding aTc

159 or IPTG (blue triangle and yellow square respectively), lowers the effective promoter strength, which can in turn lead  
 160 to changes in the state of the cell to be monostable in either the blue or yellow state. **F, G**) Phase portrait of the QS  
 161 toggle system for chosen parameter values denoted by the red dot and blue triangle in E. Variable and parameters in  
 162 E-G are nondimensionalized (see STAR methods).

163

164 We next developed a mathematical model of the toggle switches to understand under  
 165 what conditions the two versions of the circuit can exhibit bistability. Denoting by  $x(t)$  and  $y(t)$   
 166 the concentration of LacI and TetR, respectively, and by  $g(t)$  and  $h(t)$  the intracellular  
 167 concentration of QS signals, C14-HSL and C4-HSL, the model takes the form

$$168 \quad \dot{x} = a_1 \eta_1(y) \phi_1(g) - (\gamma_1 + \gamma_d)x; \quad (1a)$$

$$169 \quad \dot{y} = a_2 \eta_2(x) \phi_2(h) - (\gamma_2 + \gamma_d)y, \quad (1b)$$

170 where the parameter  $a_i$  determines the maximal production rates,  $\gamma_i$  the individual degradation  
 171 rates for LacI and TetR (numbered  $i = 1, 2$ , respectively), and  $\gamma_d$  the rate of dilution due to cell  
 172 growth. We model repression and activation of the promoters using Hill functions,  $\eta_i$  and  
 173  $\phi_i$ , respectively. The intracellular concentration of QS signals obeys similar equations (See  
 174 STAR methods for the full model).

175 We nondimensionalized Eq. (1) and performed a bifurcation analysis (see STAR  
 176 methods), to first confirm the existence of the region of bistability in the QS toggle system model  
 177 (See Fig. 2E). Moreover, as is evident in the production term of LacI and TetR in Eq. (1), the  
 178 preferred state of the QS toggle is not determined only by the presence of the QS signals, but  
 179 also the relative promoter strength. This is characterized by the following nondimensionalized  
 180 variables,

$$186 \quad \tilde{a}_1 = \frac{a_1 \theta_x}{\gamma_1 + \gamma_d} \quad \text{and} \quad \tilde{a}_2 = \frac{a_2 \theta_y}{\gamma_2 + \gamma_d}, \quad (2)$$

181 where  $\theta_x$  and  $\theta_y$  are the repression thresholds for LacI and TetR, respectively, used in the Hill  
 182 functions,  $\eta_i$ . When exogenous inducers, aTc or IPTG, are added to the system, the relative  
 183 promoter strength is modified. Following experiments, we assumed that these inducers are  
 184 provided at some constant level, denoted by nondimensionalized parameter  $\hat{v}_0$  and  $\hat{u}_0$ . This  
 185 leads to the following effective promoter strengths,

$$187 \quad \hat{a}_1^{\text{eff}} = \frac{\tilde{a}_1}{1 + \hat{v}_0} \frac{\tilde{g}^*}{1 + \tilde{g}^*}, \quad \hat{a}_2^{\text{eff}} = \frac{\tilde{a}_2}{1 + \hat{u}_0} \frac{\tilde{h}^*}{1 + \tilde{h}^*}, \quad (3)$$

188 with  $\tilde{g}^*$  and  $\tilde{h}^*$  representing the nondimensionalized C14 and C4 concentrations in the system.  
 189 Depending on the values of the bifurcation parameters ( $\hat{a}_1^{\text{eff}}, \hat{a}_2^{\text{eff}}$ ) the system can be either  
 190 mono- or bistable (see Fig. 2E-G; STAR methods for the full model).



191           The mathematical model thus predicted that bistability depends on the QS network and  
192 relative promoter strengths. We tested this prediction experimentally by engineering a few  
193 variants of the QS toggle that changed those factors (see SI). These variants exhibited changes  
194 in state preference, agreeing with the prediction of the model (Fig. S2).

195

### 196 **QS and NQS toggle behavior in colonies**

197 We next asked how the QS toggle behaves in an environment in which the QS signals are not  
198 homogeneously distributed in the population, allowing for spatial patterns to arise. To do this,  
199 we grew QS and NQS toggle colonies in LB agar plates containing aTc and monitored their  
200 growth and fluorescence over time.

201           Most strikingly, we noticed that many QS toggle colonies formed a blue ring surrounding  
202 a yellow disc (Fig. 3A), with the size of the yellow disc correlated with the aTc concentration in  
203 the agar (Fig. 3B). ATc is known to be temperature sensitive (Politi et al., 2014). Since aTc  
204 induces the expression of the yellow state, we hypothesized that aTc degradation was driving  
205 the emergence of blue cells. Indeed, we verified that prior incubation of aTc plates at 37°C  
206 directly alters the blue ring size and time of appearance (Fig. S3). Thus, the decay of aTc  
207 creates a temporal morphogen gradient, resulting in a switch in the state of some of the  
208 population.

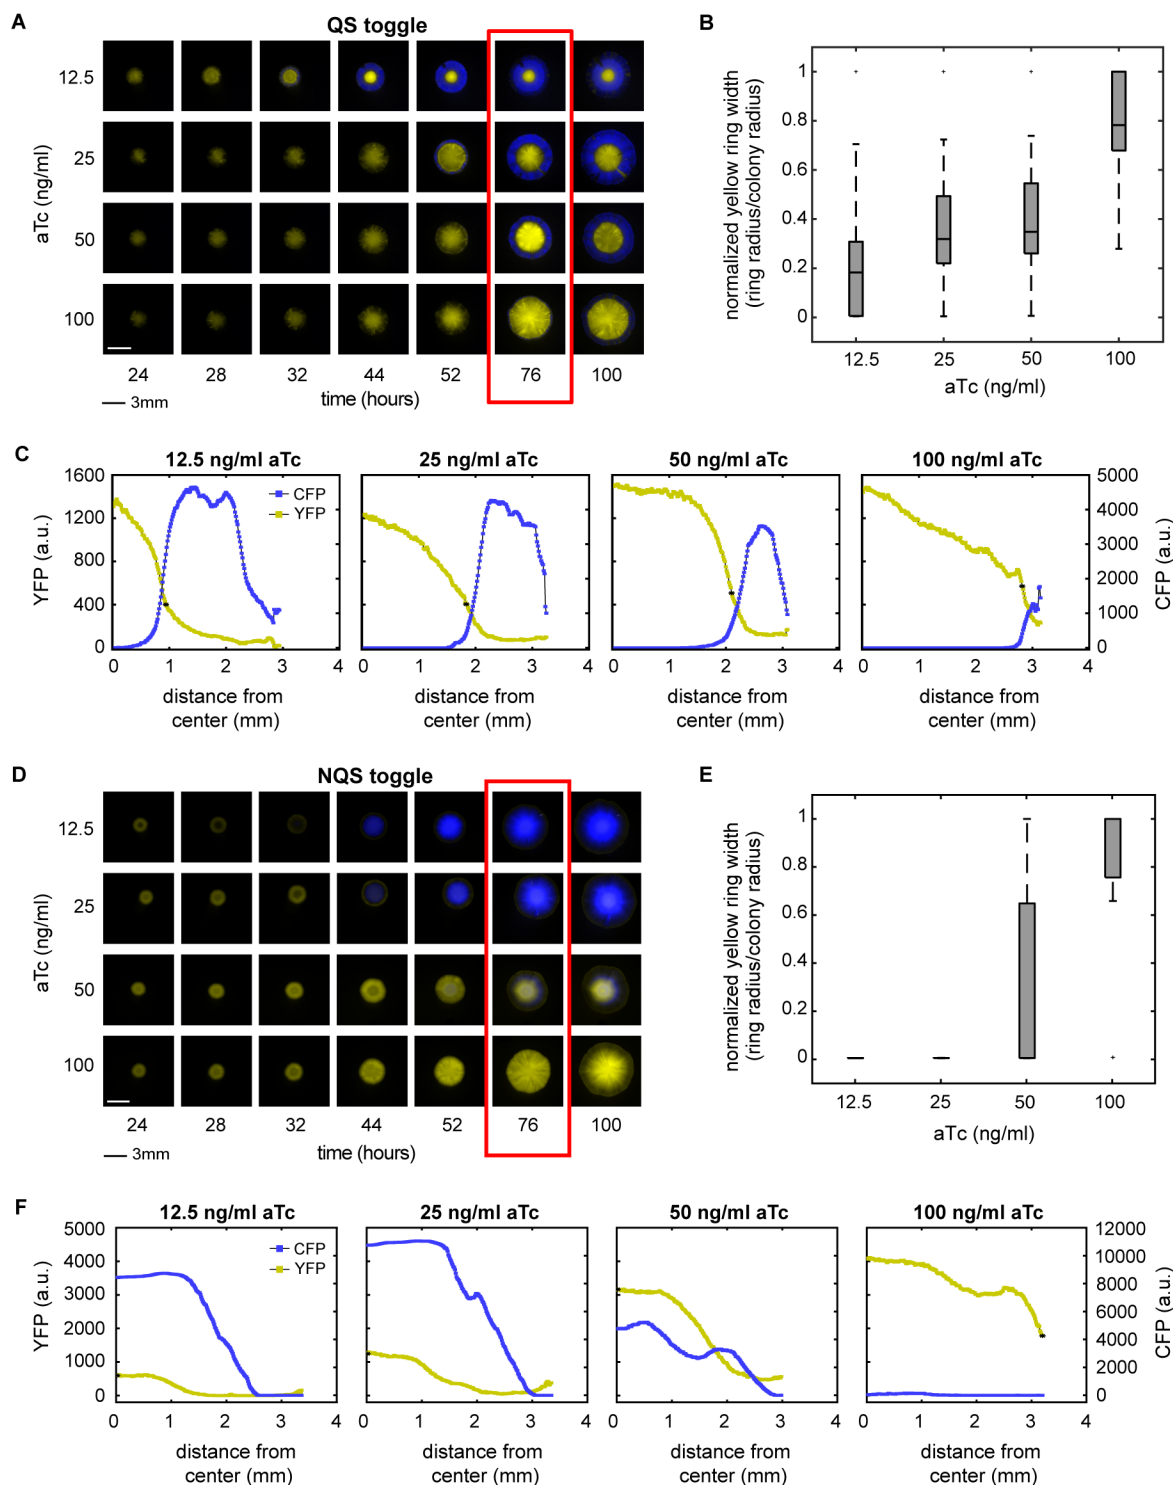

209  
 210 **Figure 3: Expanding QS and NQS toggle colonies show aTc-dependent patterning.** **A)** QS toggle colonies  
 211 obtained from plates with different initial aTc concentrations, shown at different times. **B)** Yellow ring width (center  
 212 disc) was measured among all colonies to quantify the pattern. The width was determined as the distance from the  
 213 center to the threshold point, at which yellow fluorescence fell below 30% of its maximum. The only pairwise  
 214 combination of widths not found to be statistically different was 25 and 50 ng/ml aTc ( $p < 0.01$ , Kruskal-Wallis non-

215 parametric test). Data represents at least 11 independent experiments. **C)** Fluorescence intensity cross-sectionals of  
216 the colonies shown in red in (A). Curves represent the average fluorescence of 4 radii (90° apart) of the same colony.  
217 **D)** NQS toggle colonies obtained from plates with different initial aTc concentrations, shown at different times. **E)**  
218 Yellow ring width was used to quantify the patterns as in (B). We considered yellow ring width to be zero when blue  
219 cells dominate the center (see methods for full set of assumptions). All pairwise that included 100 ng/ml aTc were  
220 found to be statistically different ( $*p < 0.01$ , Kruskal-Wallis non-parametric test). Data represents 2 independent  
221 experiments. **F)** Fluorescence intensity cross-sectionals of colonies shown in red in (C). Curves represent the  
222 average fluorescence of 4 radii of the same colony.

223

224 In the images of QS toggle colonies, we observed little overlap between cells in the  
225 yellow and blue states (Fig. 3C). Over time, the blue ring generally expanded as the colony  
226 grew, but the boundary between the yellow and blue cells remained roughly fixed. Wherever  
227 cells in the blue state took over, yellow fluorescence tended to decrease.

228 When grown on solid media, the NQS toggle behaved differently from the QS toggle.  
229 Like the QS toggle, NQS toggle colonies were initially yellow when the media contained a high  
230 enough concentration of aTc. Cells in the blue state emerged eventually but did so in a way  
231 distinct from what we observed in the QS toggle: Blue cells first appeared in colony centers, and  
232 did so earlier and at lower aTc concentrations (Fig. 3D). Most NQS toggle colonies grown with  
233 12.5-50 ng/ml aTc showed blue cells in the center at 76h (Fig. 3E), which resulted in yellow  
234 region width measurements close to zero (see Methods).

235 One of the main differences in spatial patterns between the two toggles was the degree  
236 of radial separation between the states. The QS toggle colonies appeared to segregate well in  
237 contrast to the NQS toggle colonies (Fig. 3F). To quantify the level of segregation, we measured  
238 the pixel color overlap in images from both QS and NQS colonies: For each pixel, we measured  
239 the intensity of both blue and yellow fluorescence and in Fig. 4A and B (bottom panels), we  
240 show the normalized YFP and CFP fluorescence as a function of distance from the center of the  
241 colony. We said that colors overlapped in a pixel when the values of both YFP and CFP  
242 fluorescence intensities were each above a threshold of 0.3 (out of a maximum intensity  
243 normalized to 1). To obtain the relative overlap count for a colony, we divided the number of  
244 overlapping pixels by the total number of pixels covering the colony radius (See Fig. 4C).

245 Color overlap was significantly higher in the NQS compared to QS colonies in 12.5, 25,  
246 and 50 ng/ml aTc plates ( $p < 0.01$ , Mann-Whitney non-parametric test). In 100 ng/ml aTc plates,  
247 we observed little overlap with both circuits, mostly because not all colonies contained cells in  
248 the blue state. When we excluded from analysis colonies with cells in only one state, NQS  
249 colonies displayed higher overlap than QS colonies at all aTc concentrations (Fig. S4).

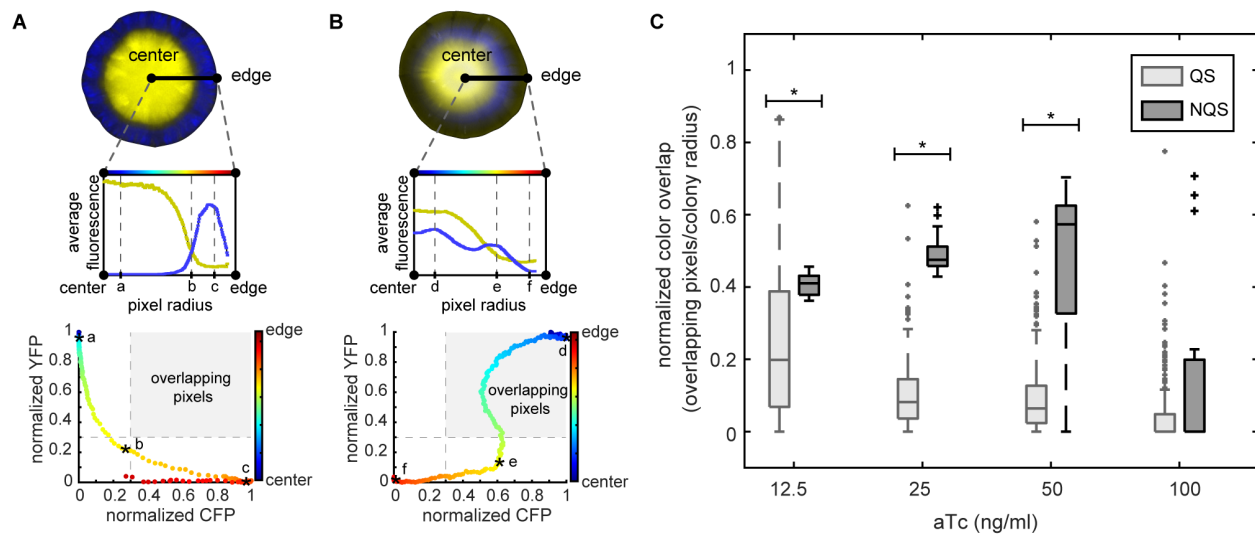

250  
 251 **Figure 4: QS colonies create better radially separated patterns than NQS colonies.** Measurement of color  
 252 overlap was used to quantify the spatial segregation of states in each colony. Average fluorescence of each colony's  
 253 radii plotted from the center of the colony to the edge (A and B, top plots). Each pixel was also plotted for both  
 254 normalized fluorescence values (A and B, bottom dot plots). Pixels were classified as overlapping when both  
 255 normalized fluorescence values were above a predefined threshold (inside the gray boxed region). **A)** Example of the  
 256 typical behavior of QS colonies. The QS colony shown is the same as that in Fig. 3A, at 50 ng/ml and 76 hours.  
 257 Asterisks (a, b, c) show the same pixels in both plots. **B)** Example for the typical behavior in NQS colonies. NQS  
 258 colony shown is from Fig. 3C, 50 ng/ml at 76 hours. Asterisks (d, e, f) show the same pixels in both plots. **C)**  
 259 Quantification of pixel overlap for QS (light gray) and NQS (dark gray) colonies. The number of overlapping pixels  
 260 was normalized by the colony radius (total). \* $p < 0.01$ , Mann-Whitney non-parametric test. Data for each QS test  
 261 contains over 180 colonies from at least 11 independent experiments, while data for each NQS test contains at least  
 262 15 colonies from 2 independent experiments.

263  
 264 Lower overlap indicates a better separation of colors, and hence a better spatial  
 265 separation of cells in the two states along the radial direction of a colony. Therefore, QS cells in  
 266 different states were better segregated radially than NQS cells. However, since we imaged the  
 267 colony from above, the higher degree of overlap in the NQS case could indicate either that cells  
 268 in the two states are intermingled, or that they are segregated vertically. To test which of these  
 269 hypotheses is more likely, we extended our mathematical models to include spatial effects, such  
 270 as colony growth, and the diffusion of inducers and signaling molecules within the agar and the  
 271 colony. We assumed that the colony is conical and grows through the addition of cells in an  
 272 active growing zone at the interface of the colony with agar (Warren et al., 2019) (see STAR  
 273 methods).

274 Simulations of our expanded models recapitulated experimental observations, and  
 275 suggested answers to our questions about the observed segregation of cells in different states.

276 In the simulations of the NQS toggle colony (Movie S1), with smaller colony sizes and abundant  
277 aTc supply from the agar, aTc levels are relatively high everywhere in the NQS toggle colony.  
278 This explains the initial colony-wide yellow state we observed in experiments (Fig. 3D). In this  
279 initial yellow state, intracellular concentration of TetR is low, leading to a low sequestration rate  
280 of aTc inside the colony. The top of the colony is further from the aTc source (agar), so that a  
281 top-down aTc gradient forms over time. As the model colony grows, we observe an increase in  
282 sequestration and degradation of aTc (due to 37°C incubation over time). Eventually, the aTc  
283 level at the top of the colony, where concentration is lowest, degrades below the point needed  
284 to keep cells in the yellow state, causing the top of the colony to turn blue. Cells entering the  
285 blue state produce more TetR, which enables higher aTc sequestration, further lowering  
286 surrounding aTc levels. As a result, we observed a blue wave traveling downwards from the top  
287 of the colony. Thus, our model predicted that the two states are vertically segregated in NQS  
288 colonies, suggesting that spatial segregation, rather than heterogeneity, is responsible for the  
289 experimentally observed color overlap. We also examined the state of the system by tracking  
290 the bifurcation parameters (Eq. 3) at the center (top) and the periphery (rim) of the NQS colony  
291 over time (Fig. 5D). In simulations, the top of the colony moves from the bistable state into the  
292 blue state, while the rim of the colony remains in the yellow state (Fig. 5B, C). Our simulations  
293 and bifurcation analysis also revealed that at higher initial aTc concentrations the blue state  
294 takes over from the top at a later time (Fig. 5A), as it takes longer for aTc to degrade to the  
295 hysteresis point at which cells can switch states.

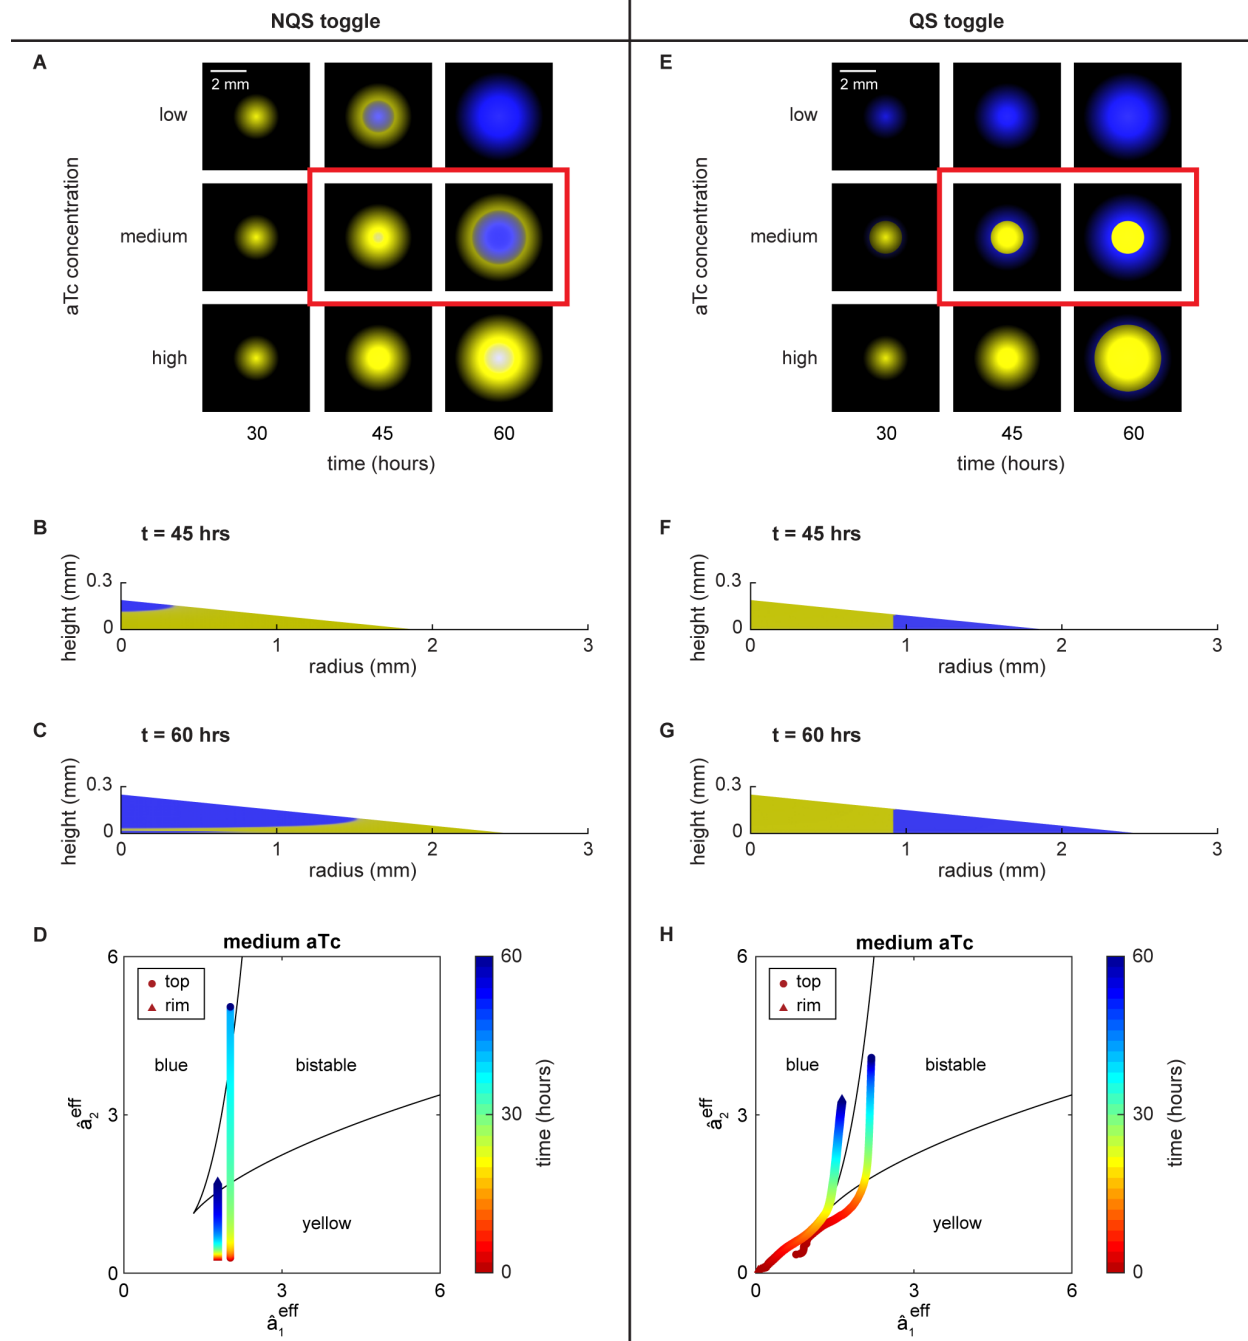

296

297

298

299

300

301

302

303

304

305

**Figure 5: PDE simulations of NQS and QS toggles.** **A)** Simulations of the NQS colony at different times and initial aTc concentration show the emergence of cells in the blue cells at the center of the colony. **B)** The cross-sectional view of the model colonies shows that cells enter the blue state first at the top of the colony, and that cells in the two states remain vertically segregated. **C)** Bifurcation diagram showing the bifurcation parameters' trajectories of cells at the top (circle) and rim (triangle) of the NQS colony. The top of the colony flips from yellow to blue. **D)** Simulations of a model QS colony show that a blue ring emerges dependent on the initial aTc concentration. **E)** The cross-sectional view of the model colonies shows that the cells in the two states are radially segregated, and that the boundary between the two states is roughly fixed, in agreement with experiments. **F)** Same as in C), but showing that in the QS colony the rim of the colony flips from the yellow to blue state.

306

307           In simulated QS toggle colonies (Movie S2), when the colony is small, abundant aTc and  
308 basal C14-HSL production led to the establishment of the initial yellow state across the colony.  
309 This state was then reinforced by the high C14-HSL signal. As indicated by Eq. 2, the dilution  
310 rate alters the effective promoter strength, leading to different steady states. Cells that are not  
311 growing or growing slowly, such as those at the top of the colony, stay in the bistable region,  
312 and do not switch states (Fig. 5H). This explains why the center of the colony remains yellow,  
313 despite reduced aTc levels due to degradation and sequestration. In contrast, for fast-growing  
314 cells, the drop in aTc concentration and the slow accumulation of C4-HSL signal from basal  
315 production allow cells to enter the blue state (Fig. 5F). Cells in the blue state start to appear at  
316 the periphery of the colony, where cells grow fastest (Movie S2). This explains why in the QS  
317 toggle color overlap is small (vertical slices are in the same state), and the boundary between  
318 the yellow and blue states is maintained at the point where the first cells turn blue (Fig. 5F, G),  
319 in agreement with experimental observations (Fig. 3A). Like the NQS toggle, higher aTc  
320 concentrations lead to the blue ring emerging later in time (Fig. 5E).

321           To verify the predictions of the model about the different spatial structures in QS and  
322 NQS colonies, we used confocal microscopy to image the 3D structures of the colonies (Fig. 6).  
323 For the NQS toggle, we observed that the colonies indeed showed vertical segregation, with  
324 cells at the top of the colony dome in the blue, and cells at the bottom in the yellow state (Fig.  
325 6C, F). We also sliced the colonies vertically and imaged their cross-sections using confocal  
326 microscopy (see Methods). The slices confirmed that cells in the blue state occupied the top of  
327 NQS colonies, while cells in the yellow state occupied the bottom, as predicted by the model  
328 (Fig. 6F). In contrast, confocal images of QS toggle colonies displayed radial separation  
329 between the states, again confirming the predictions of the model, and in agreement with our  
330 earlier analysis of experimental findings (Fig. 6A, E). Depending on the aTc concentration, the  
331 QS toggle cells at the top of the colony remained yellow, and blue cells only appeared in the  
332 outer part of the colony. Imaging of colony slices also confirmed this observation (Fig. 6E).

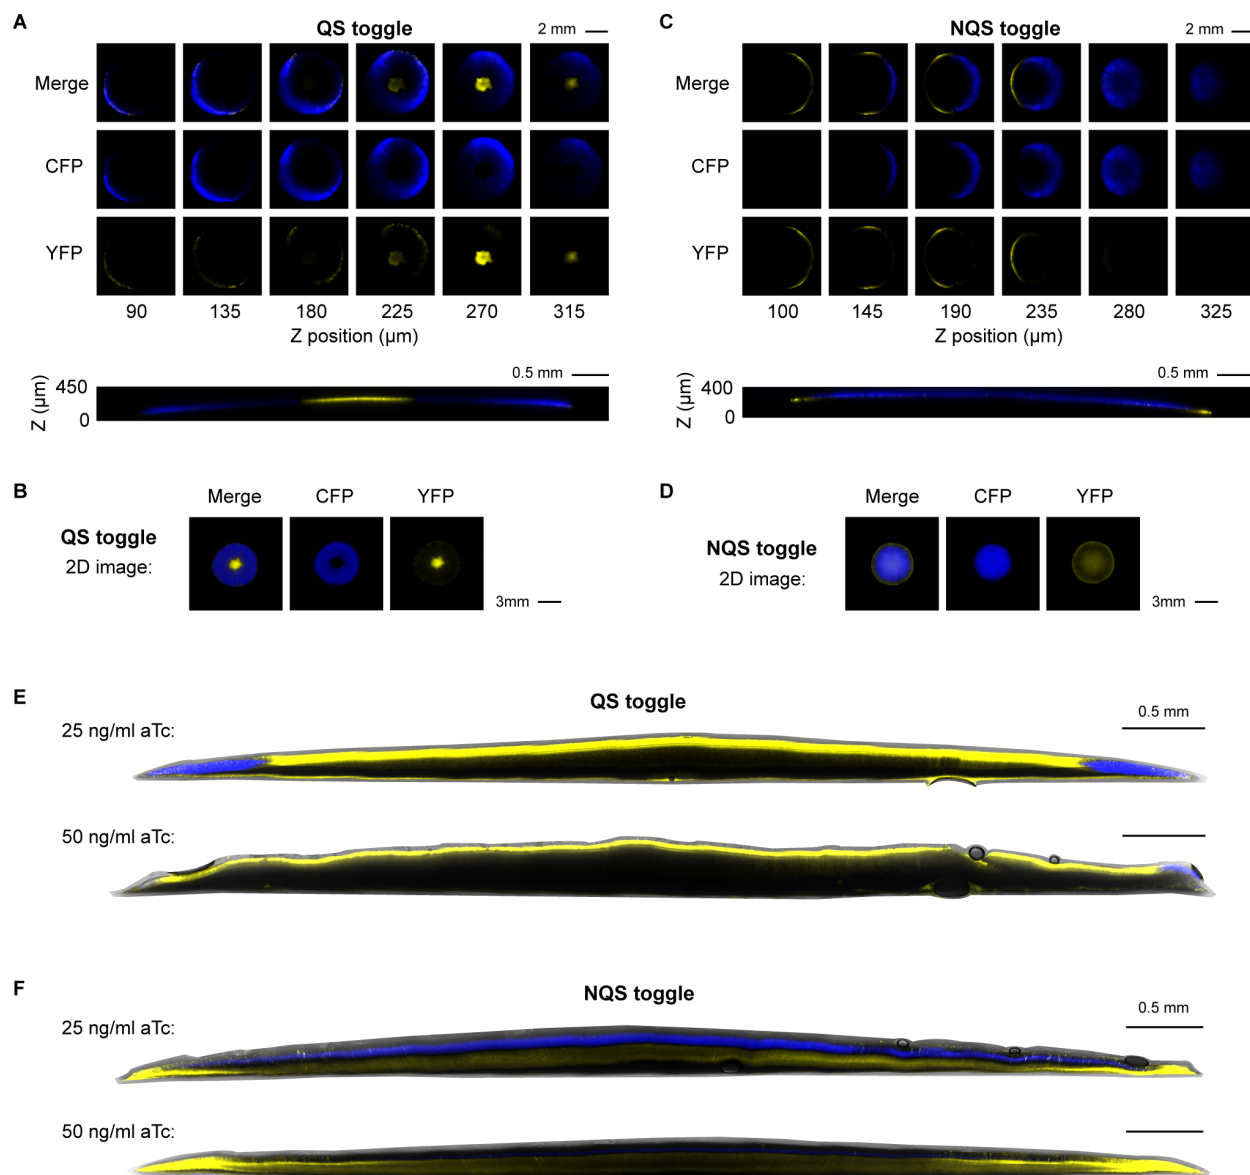

333  
 334 **Figure 6: Three-dimensional view of QS and NQS colonies.** **A)** QS toggle layers from top to bottom of colony (left  
 335 to right). Orthogonal view of the QS toggle frames is shown below. Colony is not more than 250  $\mu\text{m}$  tall. **B)** 2D image  
 336 of the same colony in (A) for comparison. Separate fluorescence channels are shown. **C)** NQS toggle layers from top  
 337 to bottom of colony (left to right). Orthogonal view of the NQS toggle frames is shown below. **D)** 2D image of the  
 338 same colony in (C) for comparison. Separate fluorescence channels are shown. **E)** Slices of different QS colonies  
 339 grown in either 25 or 50 ng/ml aTc. **F)** Slices of different NQS colonies grown in either 25 or 50 ng/ml aTc.

340  
 341 We found that ring formation in the QS toggle exhibited some variability and randomness  
 342 causing imperfect radial symmetry of the outer blue rings. Despite this variability, the difference  
 343 in color segregation between QS and NQS colonies was statistically significant (see Fig. 4).  
 344 Occasionally, we also observed the occurrence of multiple blue rings: *i.e.* the formation of  
 345 internal and external blue rings in QS toggle colonies (Fig. 7 and S5). In addition, patches of



346 blue cells sometimes failed to form a full ring (Fig. S5). These observations suggested that  
347 external or internal fluctuations could play a role in determining the observed spatial patterns.  
348 Noise can cause jumps between the stable states of a bistable system. However, we expect  
349 such switches to be localized in the absence of a mechanism that can synchronize the state  
350 across the colony. Thus, we concluded that external fluctuations that affect all or most of the  
351 colony were more likely to drive the emergence of complex spatial patterns such as multiple  
352 rings. Furthermore, when the QS toggle was grown in a different medium (EZ rich defined  
353 medium instead of LB agar), the outer blue ring pattern was disrupted. At times, we observed  
354 blue cells emerging from the center of the colony at 100 ng/ml aTc. These patterns resembled  
355 those in the NQS toggle in LB agar (Fig. 7 and S6).

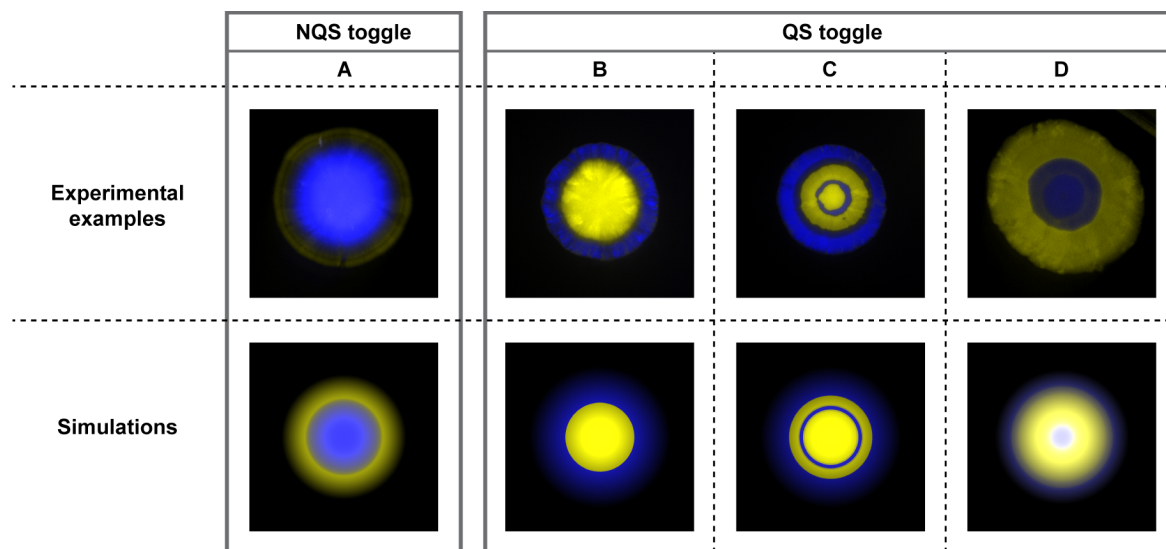

356  
357 **Figure 7: Four types of patterns obtained from experiments (top) and mathematical simulations (bottom). A)**  
358 **NQS toggle colony pattern, with vertical segregation of states and blue emergence at the center of the colony. B)**  
359 **QS toggle colony pattern, with radial segregation of states, and blue emergence at the edge of the colony, forming an**  
360 **external blue ring. C) Alternative QS toggle pattern, with radial segregation of states and multiple blue rings (internal**  
361 **and external). D) Inverted QS toggle pattern, where radial segregation of states and blue emergence at the center**  
362 **occur only in specific conditions (see SI).**

363  
364 We were able to obtain similar patterns in numerical simulations by changing parameter  
365 values, or by including extrinsic perturbations in the model we described above (Fig. 7 and  
366 STAR methods). In particular, we found that extrinsic fluctuations and growth conditions can  
367 change effective promoter strength, resulting in the formation of multiple rings and an inverted  
368 pattern in the QS system, respectively. This suggests that the complex spatial patterns we  
369 observed in some experiments can be explained using the same mechanisms underlying the  
370 predominant, single ring patterns. The variability of multi-ring patterns, along with the high

371 dimensionality of the model parameter space makes it difficult to examine such patterns  
372 systematically. A full understanding of how these complex patterns emerge, and how they can  
373 be controlled will thus require the development of new experimental approaches.

374

## 375 **Discussion**

376 Patterns, and especially ring-like patterns, formed by synthetic gene circuits are not new.  
377 Previous studies have utilized various methods to create patterns, such as internal genetic  
378 oscillations (Riglar et al., 2019), scale-invariant intracellular signaling (Cao et al., 2016), or  
379 mechanical interactions between cell types (Xiong et al., 2020). Here we show that toggle  
380 switches can also create patterns in colonies based on how they shape the cells' responses to a  
381 morphogen. Specifically, the classical NQS toggle creates a vertically segregated pattern while  
382 the QS toggle leads to a segregated ring structure. We also developed a PDE model that  
383 captured both behaviors. An analysis of the model suggests that in the NQS case sequestration  
384 of signals and geometry of the colony lead to the formation of a morphogen gradient inside the  
385 colony, creating top-down segregation. In contrast, the model suggests that fast cell growth at  
386 the periphery of QS toggle colonies and the QS signal gradient inside the colonies lead to the  
387 emergence of an outer blue ring. The difference is that, as the aTc level decreases in the QS  
388 toggle, signaling between cells in the yellow core helps to lock them in the same state.  
389 However, in the NQS toggle, the blue state becomes monostable in the absence of aTc and  
390 signals from other cells. As the aTc concentration is lowest at the top of the colony, a wave of  
391 transitions from the yellow to the blue state propagates from the colony's top downward. Our  
392 mathematical analysis implies bistability is determined by the external morphogen concentration  
393 and the effective promoter strength for each repressor, which is, in turn, determined by protein  
394 production, proteolytic degradation, dilution, and QS signals.

395 Our mathematical model provides further insight into the mechanisms behind the  
396 formation of patterns. When modeling pattern formation on the time scale of hours, one must  
397 account for expanding colony size. As suggested by Warren et al. (2019), an actively growing  
398 layer at the bottom of the colony drives the 'establishment phase' (14h – 24h). After 24 hours,  
399 the colony enters a 'flattening phase', during which vertical growth slows while radial growth  
400 remains linear. In our model, the characteristic length scale of signal diffusion is much larger  
401 than the size of a colony, and thus details of the colony expansion mechanisms do not have a  
402 large impact. We thus assumed that model colonies grow linearly in both vertical and radial  
403 directions. The location of newly born cells, on the other hand, does matter. As new cells inherit

404 the state of their parent cells, where the effective promoter strengths of the newly born cells land  
405 in the bistable region determines the emergent patterns in the colony.

406 It should be noted that our model does not precisely predict the full behaviors of the  
407 colonies. Our experiments showed that fluorescence intensities were lower in the bulk of many  
408 colonies and higher nearer the surface (Fig. 6E). This indicates that the colonies are more  
409 complex than our model suggests. Yet, our model still provides qualitative insight into the  
410 formation of the patterns and their symmetries. Further experimental studies on *E. coli* colony  
411 growth, structure, and metabolism, especially at larger colony sizes, will allow for improvement  
412 of the mathematical model and a better understanding of pattern formation in microbial colonies.

413 Our work indicates that the observed spatial patterns are dependent not just on the  
414 underlying genetic circuitry, but also on growth conditions and cellular metabolism. Our  
415 mathematical model allows us to identify which patterns are allowed by the system and the  
416 mechanisms that generate them. The presence or absence of intercellular communication, for  
417 instance, is not the determinant of a single pattern. Rather, the resultant pattern is determined  
418 by multiple factors, including morphogen concentration, promoter strengths, and intercellular  
419 signaling. Nevertheless, the presence of intercellular signaling allows one to actively control or  
420 shape the balance by implementing more spatial features, such as signal degradation, by  
421 differentiated cells or external flux. These patterns shed light into how synthetic multicellularity  
422 can be created in bacteria and provide a further step toward the creation of large scale  
423 programmable synthetic multicellular systems.

424

#### 425 **Acknowledgements**

426 B.F.M. acknowledges support from Brazilian Coordination for the Improvement of Higher  
427 Education Personnel (CAPES), through the Science without Borders (SwB) fellowship. G.F. and  
428 K.J. acknowledges support from NSF (1936770). K.J. acknowledges support from MCB-  
429 1936770. M.R.B. acknowledges support from the Welch Foundation (C-1729), the National  
430 Institutes of Health (R01GM144959), and the NSF (MCB-1936774). E.D.S. acknowledges  
431 support from grants NSF/DMS-2052455 and AFOSR FA9550-21-1-0289. The authors also  
432 acknowledge the use of resources of the Shared Equipment Authority at Rice University for this  
433 work. The computational work was completed in part with resources provided by the Research  
434 Computing Data Core at the University of Houston.

435

#### 436 **Author contributions**

437 Conceptualization, B.F.M., G.F., E.D.S., K.J., M.R.B.; methodology, B.F.M., G.F., E.D.S., K.J.,  
438 M.R.B.; validation, B.F.M., M.R.B.; data curation, B.F.M.; investigation, B.F.M., G.F.; formal  
439 analysis, B.F.M., G.F.; visualization, B.F.M., G.F.; writing – original draft, B.F.M., G.F., K.J.,  
440 M.R.B.; writing – review & editing, B.F.M., G.F., E.D.S., K.J., M.R.B.; software, G.F.; project  
441 administration, B.F.M., G.F., K.J., M.R.B.; funding acquisition, B.F.M., K.J., M.R.B.; supervision,  
442 K.J., M.R.B.

443

#### 444 **Declaration of interests**

445 The authors declare no competing interests.

446

#### 447 **Main figure titles and legends**

448 (In text)

449

#### 450 **STAR Methods**

##### 451 **Methods**

##### 452 **Plasmids and strains**

453 We constructed plasmids with either PCR-based, restriction enzyme cloning, or Golden gate  
454 assembly methods. QS and NQS toggles, as well as all other tested versions, are composed  
455 with 3 plasmids each, providing resistance to kanamycin, chloramphenicol and spectinomycin. A  
456 list of all plasmids employed is provided in Table S1. For this study, we used the CY027 *E. coli*  
457 strain, a BW25113 derivative (Chen et al., 2015). This strain has the *lacI*, *araC* and *sdiA* genes  
458 knocked out, and constitutive *cinR* and *rhIR* knocked-in to its genome to enable QS  
459 communication ( $\Delta lacI \Delta araC \Delta sdiA P_{trc}^* cinR P_{trc}^* rhIR$ ).

460

##### 461 **Plate reader experiments**

462 From single colonies, we inoculated cells containing the appropriate plasmids into 5 mL LB with  
463 antibiotics (50  $\mu$ g/mL kanamycin, 34  $\mu$ g/mL chloramphenicol, 50  $\mu$ g/mL spectinomycin) for  
464 overnight growth at 37°C in a shaker (250 rpm). Then, we diluted the culture 1:100 in minimal  
465 M9CA broth (Teknova) with antibiotics, and we grew these cells for 2 hours in a 37°C shaker  
466 (250 rpm). Meanwhile, we prepared 96-well round bottom plates with minimal M9CA broth,  
467 antibiotics, and applicable inducers (IPTG and aTc) with a 2-fold final concentration of a volume  
468 of 100  $\mu$ L per well. After the 2-hour growth, we added 100  $\mu$ L of cell outgrowth to each well  
469 (1:1). We incubated the plates at 37°C, shaking at 800 rpm. After 2 hours, we read each plate in  
470 a Tecan Infinite M1000 for growth (OD, 600 nm), YFP fluorescence (ex, 514 nm; em, 527 nm),

471 and CFP fluorescence (ex, 433 nm; em, 475 nm). We used cells without plasmids to measure  
472 background auto-fluorescence. The results shown are reported as (fluorescence-  
473 background)/OD<sub>600</sub>.

474

### 475 **Flow cytometry**

476 We inoculated cells from single colonies into 5 mL LB with antibiotics and either 0.5 mM IPTG  
477 (pre-IPTG) or 50 ng/ml aTc (pre-aTc) for the overnight growth at 37°C in a shaker (250 rpm).  
478 Next, we prepared 96-well round bottom plates with minimal M9CA broth, antibiotics, and  
479 applicable inducers (IPTG and aTc) with a 2-fold final concentration at a volume of 100 µL per  
480 well. We diluted the overnight cultures 1:50 in minimal M9CA broth with antibiotics, and we  
481 added 100 µL of this cell dilution to each well (1:1, final cell dilution of 1:100). We incubated the  
482 plates at 37°C, shaking at 650 rpm. After 3 hours (and 9 or 12 hours for stationary phase tests),  
483 we kept the plates on ice for at least 10 min. Then, we added 25 µL of each well to a tube with  
484 475 µL of 1x PBS (5% dilution), and vortexed the tube. We analyzed each tube with the Sony  
485 SH800S Cell Sorter. We used filters for mCFP and EYFP. Due to overlap in their fluorescence  
486 spectra, we used single fluorescence controls and the Sony software calculated compensations  
487 for each fluorophore. All CFP and YFP values shown here are compensated. For each sample,  
488 we recorded 10,000 events. We exported and analyzed the acquired data with FlowJo. We  
489 manually created the fluorescence gates. The common existence of OFF cells among the  
490 circuits (i.e., cells that are expressing neither CFP nor YFP) generated the need for an OFF  
491 gate. We created blank controls for each circuit by transforming the circuit plasmids with an  
492 empty reporter plasmid instead of the regular CFP/YFP one. We used these circuits to  
493 determine the OFF gate. Next, we created CFP+ and YFP+ gates by drawing a diagonal line  
494 from top right to bottom left, until it reaches the OFF gate. CFP+ gate is at the upper left of this  
495 line, while YFP+ is at the bottom right. We exported geometric mean values and population  
496 composition based on these gates from FlowJo and plotted with Matlab. For the confocal tests,  
497 we also used the Sony SH800S to sort single cells into small petri dishes (60 mm) containing LB  
498 agar. We attached the dishes to the 96-well-plate stage for sorting, and later put them into 37°C  
499 incubator for growth into single colonies.

500

### 501 **Colony tests**

502 We prepared LB agar plates with antibiotics (50 µg/mL kanamycin, 34 µg/mL chloramphenicol,  
503 50 µg/mL spectinomycin), and aTc (12.5, 25, 50 or 100 ng/ml). We inoculated cells from single  
504 colonies into 5 mL LB with antibiotics and 0.0625 mM IPTG for overnight growth at 37°C in a

505 shaker (250 rpm). Next, we diluted the culture 1:100 in 4 mL LB with antibiotics and 0.0625 mM  
506 IPTG, and we grew the culture at 37°C shaker (250 rpm) until it reached an OD<sub>600</sub> between 0.7-  
507 0.8 (approximately 2 hours). We then diluted the culture with LB to reach an OD<sub>600</sub> range  
508 between 0.35-0.4. Then, we used 1 mL of the diluted outgrowth for serial dilutions until we  
509 achieved 1:10,000 and 1:100,000 (outgrowth:LB) ratios. We put plates to warm up in 37°C  
510 incubator for at least an hour before plating. Then, we plated both 1:10,000 and 1:100,000  
511 dilutions into 2 equal sets of plates, with 12 glass beads per plate. We wrapped plates in foil to  
512 avoid light exposure of aTc, and we put them in a 37°C incubator. We took the plates at 24, 28,  
513 32, 44, 52, 76 and 100h post-plating to be imaged in a low-magnification microscope (see 2D  
514 imaging).

515

### 516 **HPLC test**

517 To quantify aTc concentration from LB agar fragments, we modified the method from (Halling-  
518 Sørensen et al., 2002). We used an Agilent 1220 Infinity LC instrument, and a C-18  
519 chromatographic column (Aeris 3.6 µm Peptide XB-C18 100A LC column 250 x 4.6 mm). To  
520 start, we directly tested aTc in the following amounts: 5 µg, 2.5 µg, 1.25 µg, 0.625 µg, 0.3125  
521 µg, 0, 15625 µg. From the area under peak, we generated a calibration curve and an equation  
522 for aTc quantification for the following tests (Fig. S3A). We prepared triplicates of 13 mL LB agar  
523 with aTc at final concentration of 100 µg/mL. Then, we poured 6 mL of each triplicate into two  
524 24-well plates (1 mL/well). We prepared a total of 36 wells (triplicates for 6 reads in 2 plates). To  
525 measure the aTc, we transferred the solidified media from each well to separate tubes, and we  
526 diluted each with 9 mL of water. The tubes were kept in the dark and at RT for 2 hours. Then,  
527 we centrifugated the tubes and filter sterilized the liquid. First, we measured triplicate samples  
528 (100 µL injection each) in HPLC before any actual incubation (day 0). Then, we incubated one  
529 plate for 48 hours at 37°C (the one without a set of triplicates from day 0 read), while we  
530 incubated the other plate at 4°C to recreate the two possible pre-treatments, as described in  
531 Colony tests section. After the first 48 hours, we also incubated the 4°C plate at 37°C, except for  
532 a set of triplicates that was kept at 4°C until the end of the experiment. We continued the  
533 incubation for a total of 6 days to recapitulate the actual experimental setup (see Colony tests).  
534 Each day starting at day 2, we removed a set of triplicates from each plate, then, treated and  
535 injected in the HPLC as explained above. Finally, we quantified aTc by measuring the area  
536 under the peak for each run.

537

### 538 **2D imaging**

539 We imaged plates with colonies with a stereo microscope (Nikon SMZ800), YFP and CFP  
540 fluorescence filters (Chroma #39003 and #39001, respectively), and NIS-Elements software  
541 (Nikon). QS and NQS toggles are very different circuits, and therefore, have different  
542 fluorescence intensities. For this reason, we used distinct settings for each circuit. We imaged  
543 QS toggle colonies with an exposure time of 300 ms for YFP and CFP. While NQS toggle had  
544 lower intensities, we used an exposure time of 1 s for both YFP and CFP. We manually imaged  
545 each frame for CFP, YFP and bright field to form a multichannel image. Therefore, not all  
546 colonies were captured from all plates. Whenever there were many colonies, we generally  
547 picked 4 frames per plate to cover as many well-separated colonies as possible. We either did  
548 not image or did not analyze colonies that were in contact with other colonies. We exported  
549 each multichannel image into 3 separate tiff files. We assembled colony images with Fiji  
550 (ImageJ). We used identical minimum and maximum fluorescence values among images in the  
551 same figure to enable direct comparison, but different values across circuits. For confocal tests,  
552 we also imaged colonies with the stereo microscope before any agarose was added. In such  
553 images, we used the same exposure time settings for YFP and CFP for QS and NQS toggles (1  
554 s for YFP and 300 ms for CFP). In Fiji, we did not use the same adjusted minimum and  
555 maximum fluorescence values for QS and NQS toggles, making these images not directly  
556 comparable in respect to their fluorescence intensities.

557

### 558 **Confocal imaging**

559 We sorted single cells into LB agar plates (see Flow cytometry), containing antibiotics and aTc  
560 (25 ng/ml or 50 ng/ml). We incubated the plates at 37°C, wrapped in foil, for different times,  
561 ranging from 32 to 72 hours. After growth, we covered each colony with approximately 1 mL of  
562 an autoclaved 1% agarose solution. For the full colony images, we cut out pieces of agar with  
563 agarose-covered colonies, we placed them upside down (with agarose on bottom) on glass  
564 coverslips and took them to the Nikon A1 Confocal microscope. For the perpendicular cross-  
565 section, we manually cut the pieces in the middle with a blade. We placed the middle part into a  
566 glass coverslip for imaging on a Nikon A1 Confocal microscope. In the confocal, we used 405  
567 nm and 488 nm lasers for excitation of CFP and YFP, respectively. We acquired images with  
568 10x (for full colony Z-stacks) or 20x objective (for slices), resonant scanner, 1 A.U., with denoise  
569 capture mode. For Z-stacks, steps varied from 5.1 to 15  $\mu\text{m}$  distance, for a total of 200-500  $\mu\text{m}$   
570 coverage within the Z axis. We exported the data into separate tiff files. We made videos with  
571 Fiji (Image J). We used identical minimum and maximum fluorescence values among images  
572 from the same circuit replicates to enable direct comparison, except for figures of slices. We

573 also captured colonies with stereo microscope (2D imaging) prior to agarose solution addition  
574 for comparison.

575

## 576 **Data analysis**

577 We performed all data analyses in Matlab. First, we manually selected all colonies each frame,  
578 and we took the average YFP and CFP fluorescence of four radii (one per direction: N, S, E, W)  
579 per colony. We used the bright field for mask creation and detection of colonies. We selected  
580 regions without colonies for background, which we subtracted from initial intensities. We saved  
581 all data from all colonies in the same plate in a matrix per time point. We determined the yellow  
582 width by measuring the distance from the center of the colony to the threshold point, in which  
583 yellow fluorescence first reaches below 30% of its maximum. We then normalized this distance  
584 by dividing with the total colony length (radius), giving results between 0 and 1. To obtain this  
585 measure we made several assumptions: if the maximum YFP value was below a certain  
586 arbitrary threshold of 200, the yellow color was considered absent, and the normalized yellow  
587 width was 1 divided by total length (close to zero). If the maximum CFP value was below an  
588 arbitrary threshold of 300, the blue color was considered absent, and the normalized yellow  
589 width was 1. When the maximum YFP intensity at a particular pixel also had CFP above a very  
590 high second threshold of 2000, this probably represented a random patch of yellow cells  
591 between blue cells, and we assumed yellow was absent for purposes of width calculation.  
592 Lastly, when blue was absent, and YFP showed small variation between maximum and  
593 minimum (below 170), the colony was considered completely yellow, we selected the full colony  
594 as the width, instead of the highest value. We picked all these arbitrary threshold values for CFP  
595 and YFP through observation. We used them equally for all colonies of both circuits.  
596 Furthermore, we normalized each colony's original fluorescence data by its maximum to allow  
597 for color overlap analysis. We plotted each pixel from the center to the edge of the colony by its  
598 normalized YFP and CFP fluorescence, and they were only classified as overlapping when both  
599 YFP and CFP values were above the threshold of 0.3. Some colonies were found to have only  
600 one color throughout the entire radius, for example, some of all-yellow colonies at high aTc  
601 concentration. Therefore, such colonies do not show any overlap, and can skew the data. To  
602 remove single color data (Fig. S4), we selected only colonies that had both colors present for at  
603 least 25% of pixels. Finally, we compared all data from QS colonies to NQS. Both yellow width  
604 and overlap data showed a non-normal distribution, thus, we performed non-parametric  
605 statistical tests. We analyzed comparisons among 4 different aTc concentrations of the same  
606 circuit with Kruskal-Wallis test (non-parametric equivalent to one-way ANOVA), followed by



607 multiple comparison test (Tukey-Kramer). While we analyzed direct comparison among 2 sets of  
608 data with Mann-Whitney test (non-parametric equivalent to Student's t-test).

609

## 610 **Mathematical model**

### 611 **Section I – Bistability in Well-mixed Environment/Liquid Culture**

612 In the following we describe the set of equations modeling the concentrations of Lacl and TetR  
613 within the cells in the population. We assume that these concentrations are approximately  
614 proportional to the fluorescent signals which are measured experimentally and use this  
615 assumption to compare experimental and modeling results.

#### 616 **1. Single-cell Model Derivation**

617 We let  $x(t)$  and  $y(t)$  represent the concentration of Lacl and TetR, respectively. Assuming that  
618 the intracellular concentrations of Lacl and TetR are proportional the concentrations of the  
619 fluorescent proteins YFP and CFP, respectively, the quantities  $x(t)$  and  $y(t)$  are then directly  
620 related to the experimentally measured fluorescence. We therefore compare the evolution  $x(t)$   
621 and  $y(t)$  predicted by our model to the experimentally measured fluorescence signals.

622 The production of Lacl is regulated by a promoter, which can be activated by QS signaling  
623 molecules (C14-HSL bound to CinR), and repressed by TetR. Similarly, production of TetR is  
624 activated by the QS signal (C4-HSL bound to RhlR), and repressed by Lacl. We denote by  $g(t)$   
625 and  $h(t)$  the concentration of QS signals C14-HSL and C4-HSL at time  $t$ , respectively. We also  
626 assume that Lacl and TetR can be produced at maximum rates  $a_1$  and  $a_2$ , and are degraded  
627 with rate constants  $\gamma_1$  and  $\gamma_2$ , in addition to constant dilution at rate  $\gamma_d$  due to cell growth. We  
628 can then model the dynamics of the QS toggle using the following system of ODEs describing  
629 the intracellular concentrations of Lacl and TetR in one of the cells in the colony (Gardner et al.,  
630 2000b; Nordholt et al., 2017; Zong et al., 2018):

$$631 \quad \dot{x} = a_1 \eta_1(y) \phi_1(g) - (\gamma_1 + \gamma_d)x; \quad (1a)$$

$$632 \quad \dot{y} = a_2 \eta_2(x) \phi_2(h) - (\gamma_2 + \gamma_d)y. \quad (1b)$$

633 The repression of the promoter is represented by Hill functions  $\eta_1$  and  $\eta_2$ , while activation is  
634 represented by Hill functions  $\phi_1$  and  $\phi_2$ . In particular, we set

$$635 \quad \eta_1(y(t)) = \frac{\theta_y^{n_1}}{\theta_y^{n_1} + y(t)^{n_1}}, \quad \eta_2(x(t)) = \frac{\theta_x^{n_2}}{\theta_x^{n_2} + x(t)^{n_2}}. \quad (2a)$$

636 and

$$637 \quad \phi_1(g(t)) = \frac{g(t)}{\theta_g + g(t)}, \quad \phi_2(h(t)) = \frac{h(t)}{\theta_h + h(t)}. \quad (2b)$$

638 Here, the choice of Hill coefficients is based on the number of monomers in the activator (1 for  
639 C14 and C4) and repressor ( $n_1 = 2$  for TetR and  $n_2 = 4$  for Lacl).

640 We model the dynamics of the intercellular QS signals, C14-HSL and C4-HSL, whose  
641 activation is repressed by TetR and Lacl, by the following equations,

$$642 \quad \dot{g} = a_3\beta_1 + a_3(1 - \beta_1)\eta_1(y) - (\gamma_3 + \gamma_d)g; \quad (3a)$$

$$643 \quad \dot{h} = a_4\beta_2 + a_4(1 - \beta_2)\eta_2(x) - (\gamma_4 + \gamma_d)h. \quad (3b)$$

644 Here, C14-HSL and C4-HSL are produced with maximum rate  $a_3$  and  $a_4$ , and degraded at rate  
645  $\gamma_3$  and  $\gamma_4$ , respectively. Further, let  $a_3\beta_1$  and  $a_4\beta_2$  represent the base production rate of the QS  
646 signals. Setting  $\phi_1(g(t)) = 1$  and  $\phi_2(h(t)) = 1$  results in equations that describe the NQS  
647 toggle.

648 When exogenous inducers, IPTG, and aTc, which we denote by U and V, are added to  
649 the well-mixed liquid culture, the state of the system can be changed. Following experiments,  
650 we will assume that IPTG and aTc are provided at some background concentration level,  $u_0$  and  
651  $v_0$ , respectively. De-repression of the production of Lacl/TetR is achieved through inducers  
652 binding to their corresponding repressors. Let X and Y represent the unbound/free repressor, Lacl  
653 and TetR, correspondingly. If  $\hat{X}$  and  $\hat{Y}$  denote the inducer-bound complex the binding activity can  
654 be described by the following reaction scheme,

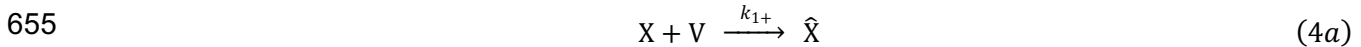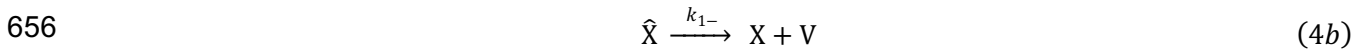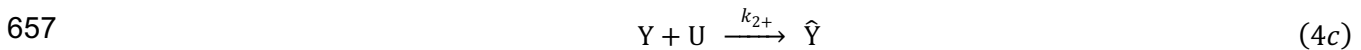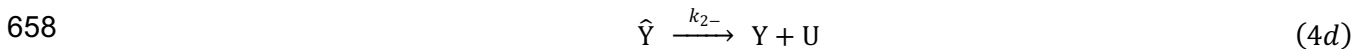

659 Let  $x_b(t)$  and  $y_b(t)$  represent the concentration of bound Lacl ( $\hat{X}$ ) and bound TetR ( $\hat{Y}$ ), we then  
660 have that

$$661 \quad \dot{x}_b = k_{1+}x_f v_0 - k_{1-}x_b - (\gamma_1 + \gamma_d)x_b; \quad (5a)$$

$$662 \quad \dot{y}_b = k_{2+}y_f u_0 - k_{2-}y_b - (\gamma_2 + \gamma_d)y_b. \quad (5b)$$

663 Here,  $x_f(t)$  and  $y_f(t)$  represents the free Lacl and TetR. By conservation law, we have that  $x(t) =$   
664  $x_b(t) + x_f(t)$  and  $y(t) = y_b(t) + y_f(t)$ .

665 Hence, the set of equations describing the dynamics of the intracellular concentrations of  
666 Lacl, TetR, the signaling molecules, as well as the concentrations of bound Lacl and TetR is  
667 given by,

$$668 \quad \dot{x} = a_1\eta_1(y_f)\phi_1(g) - (\gamma_1 + \gamma_d)x; \quad (6a)$$

$$669 \quad \dot{y} = a_2\eta_2(x_f)\phi_2(h) - (\gamma_2 + \gamma_d)y; \quad (6b)$$

$$670 \quad \dot{g} = a_3\beta_1 + a_3(1 - \beta_1)\eta_1(y_f) - (\gamma_3 + \gamma_d)g; \quad (6c)$$

$$671 \quad \dot{h} = a_4\beta_2 + a_4(1 - \beta_2)\eta_2(x_f) - (\gamma_4 + \gamma_d)h; \quad (6d)$$

$$672 \quad \dot{x}_b = k_{1+}x_f v_0 - k_{1-}x_b - (\gamma_1 + \gamma_d)x_b; \quad (6e)$$

$$673 \quad \dot{y}_b = k_{2+}y_f u_0 - k_{2-}y_b - (\gamma_2 + \gamma_d)y_b. \quad (6f)$$

## 674 2. Nondimensionalization and Bifurcation Analysis

675 To simplify analysis, we next assume that  $\gamma_1 = \gamma_2 = \gamma$ . Defining the rescaled time  $\tau = (\gamma + \gamma_d)t$ ,  
 676 we can nondimensionalize each variable using its corresponding threshold to obtain the  
 677 following nondimensionalized QS toggle system,

$$678 \quad \frac{d\tilde{x}}{d\tau} = \frac{\tilde{a}_1}{1 + \tilde{y}_f^{n_1}} \frac{\tilde{g}}{1 + \tilde{g}} - \tilde{x}; \quad (7a)$$

$$679 \quad \frac{d\tilde{y}}{d\tau} = \frac{\tilde{a}_2}{1 + \tilde{x}_f^{n_2}} \frac{\tilde{h}}{1 + \tilde{h}} - \tilde{y}; \quad (7b)$$

$$680 \quad \frac{d\tilde{g}}{d\tau} = \frac{\tilde{a}_3}{1 + \tilde{y}^{n_1}} - \tilde{\gamma}_3\tilde{g}; \quad (7c)$$

$$681 \quad \frac{d\tilde{h}}{d\tau} = \frac{\tilde{a}_4}{1 + \tilde{x}^{n_2}} - \tilde{\gamma}_4\tilde{h}; \quad (7d)$$

$$682 \quad \frac{d\tilde{x}_b}{d\tau} = \tilde{x}_f\tilde{v}_0 - \tilde{k}_{1-}\tilde{x}_b - \tilde{x}_b; \quad (7e)$$

$$683 \quad \frac{d\tilde{y}_b}{d\tau} = \tilde{y}_f\tilde{u}_0 - \tilde{k}_{2-}\tilde{y}_b - \tilde{y}_b, \quad (7f)$$

684 with  $\tilde{x}_f = \tilde{x} - \tilde{x}_b$  and  $\tilde{y}_f = \tilde{y} - \tilde{y}_b$ . Here the nondimensionalized variables and parameters are,

$$685 \quad \tilde{x} = \frac{x}{\theta_x}; \tilde{y} = \frac{y}{\theta_y}; \tilde{g} = \frac{g}{\theta_g}; \tilde{h} = \frac{h}{\theta_h}; \tilde{x}_b = \frac{x_b}{\theta_x}; \tilde{y}_b = \frac{y_b}{\theta_y}; \tilde{x}_f = \frac{x_f}{\theta_x}; \tilde{y}_f = \frac{y_f}{\theta_y};$$

$$686 \quad \tilde{a}_1 = \frac{a_1}{\theta_x(\gamma + \gamma_d)}; \tilde{a}_2 = \frac{a_2}{\theta_y(\gamma + \gamma_d)}; \tilde{a}_3 = \frac{a_3}{\theta_g(\gamma + \gamma_d)}; \tilde{a}_4 = \frac{a_4}{\theta_h(\gamma + \gamma_d)};$$

$$687 \quad \tilde{\gamma}_3 = \frac{\gamma_3 + \gamma_d}{\gamma + \gamma_d}; \tilde{\gamma}_4 = \frac{\gamma_4 + \gamma_d}{\gamma + \gamma_d}; \tilde{v}_0 = \frac{k_{1+}v_0}{\gamma + \gamma_d}; \tilde{u}_0 = \frac{k_{2+}u_0}{\gamma + \gamma_d}; \tilde{k}_{1-} = \frac{k_{1-}}{\gamma + \gamma_d}; \tilde{k}_{2-} = \frac{k_{2-}}{\gamma + \gamma_d}$$

688 Eq. (7) describes the NQS toggle system after removing (7c-d) and setting  $\tilde{g}/(1 + \tilde{g}) = 1$  and  
 689  $\tilde{h}/(1 + \tilde{h}) = 1$  in (7a-b). The nondimensionalization shows that, in the NQS toggle system, the  
 690 strength of the repressor,  $\tilde{a}_1$  and  $\tilde{a}_2$ , is determined by a balance between production,  
 691 degradation, dilution and the repression threshold. In the QS system, the effective repressor  
 692 strength is modified by the QS signal profile. That is,

$$693 \quad \tilde{a}_1^{\text{eff}}(t) = \frac{a_1}{\theta_x(\gamma + \gamma_d)} \frac{\tilde{g}(t)}{1 + \tilde{g}(t)}; \tilde{a}_2^{\text{eff}}(t) = \frac{a_2}{\theta_y(\gamma + \gamma_d)} \frac{\tilde{h}(t)}{1 + \tilde{h}(t)}$$

694 To understand how the different parameters impact the equilibria of the system, we first  
 695 obtain the equilibria by setting the derivatives in Eq. (7) to 0. Denoting the equilibrium values of  
 696 the different dynamical variables by a star, we have that,  $\tilde{x}_f^*$  and  $\tilde{y}_f^*$  satisfy,

$$697 \quad F_1(\tilde{x}_f^*, \tilde{y}_f^*) := \frac{\hat{a}_1^{\text{eff}}}{1 + \tilde{y}_f^{*n_1}} - \tilde{x}_f^* = 0, \quad (8a)$$

$$698 \quad F_2(\tilde{x}_f^*, \tilde{y}_f^*) := \frac{\hat{a}_2^{\text{eff}}}{1 + \tilde{x}_f^{*n_2}} - \tilde{y}_f^* = 0, \quad (8b)$$

699 with

$$700 \quad \hat{a}_1^{\text{eff}} = \frac{\tilde{a}_1}{1 + \hat{v}_0} \frac{\tilde{g}^*}{1 + \tilde{g}^*}, \quad \hat{a}_2^{\text{eff}} = \frac{\tilde{a}_2}{1 + \hat{u}_0} \frac{\tilde{h}^*}{1 + \tilde{h}^*},$$

701 and

$$702 \quad \hat{v}_0 = \frac{\tilde{v}_0}{\tilde{k}_{1-} + 1}, \quad \hat{u}_0 = \frac{\tilde{u}_0}{\tilde{k}_{2-} + 1}.$$

703 Let  $\mathcal{L} \subset \mathbb{R}^2$  represents the bifurcation curve in the  $(\hat{a}_1^{\text{eff}}, \hat{a}_2^{\text{eff}})$  parameter space, that is the curve  
 704 in parameter space at which the behavior of the system changes qualitatively. Thus, crossing  
 705 the bifurcation curve leads to a change in the number of equilibria and/or their stability  
 706 (Kuznetsov, 2004). Except for the steady-state condition described in equations (8a-b), points  
 707 on the bifurcation curve  $\mathcal{L}$  additionally must satisfy a matching slope condition (Kuznetsov,  
 708 2004). That is,

$$709 \quad - \left. \frac{\partial F_1 / \partial \tilde{x}_f^*}{\partial F_1 / \partial \tilde{y}_f^*} \right|_{(\tilde{x}_f^*, \tilde{y}_f^*)} = - \left. \frac{\partial F_2 / \partial \tilde{x}_f^*}{\partial F_2 / \partial \tilde{y}_f^*} \right|_{(\tilde{x}_f^*, \tilde{y}_f^*)}.$$

710 After some algebra, the above condition can be simplified as following,

$$711 \quad \hat{a}_1^{\text{eff}} \hat{a}_2^{\text{eff}} = n_1 n_2 \tilde{x}_f^{*n_2+1} \tilde{y}_f^{*n_1+1}. \quad (8c)$$

712 Solving system (8) numerically gives us the cusp bifurcation curve  $\mathcal{L}$  in the  $(\hat{a}_1^{\text{eff}}, \hat{a}_2^{\text{eff}})$  space, as  
 713 shown in Figure 2E. Nullclines plotted in Figure 2F, G are given by solving system (8a-b) for  
 714  $\hat{a}_1^{\text{eff}} = 3/(1 + \hat{v}_0)$  and  $\hat{a}_2^{\text{eff}} = 3/(1 + \hat{u}_0)$ .

715

## 716 Section II – Spatial-temporal Dynamics of the NQS and QS colony

717 Using the model of the intracellular dynamics developed above, we next describe a model of the  
 718 spatiotemporal dynamics of the corresponding quantities in a growing bacterial colony.

### 719 1. Domain

720 The domain,  $\Omega \subseteq \mathbb{R}^3$ , on which we define the model consists of two different subdomains,  $\Omega =$   
 721  $\Omega_1 \cup \Omega_2$ , with  $\Omega_1$  representing the part of the domain occupied by the bacterial colony, and  $\Omega_2$

722 the part occupied by the agar. The agar plate takes the shape of a cylinder, and we assume that  
723 the colony takes shape of a cone (Warren et al., 2019b), as show in Fig. S7A. Assuming radial  
724 symmetry, we can reduce the 3D domain to a 2D slice.

725 There are two different types of boundaries: The inner boundary, represented by  $\partial\Omega^{\text{in}}$ ,  
726 and the outer boundary, represented by  $\partial\Omega$ . The inner boundary is the interface between the  
727 colony subdomain,  $\Omega_1$ , and the agar subdomain,  $\Omega_2$ . The outer boundary is the union of the  
728 colony-air interface and the agar-plate interface.

729 The colony is observed experimentally over tens of hours during which it can grow  
730 substantially. We therefore include colony growth in the model. Previously, Warren et al. (2019)  
731 have identified three phases of colony expansion: The initial monolayer phase (0-13 h); the  
732 establishment phase (14-24 h); the flattening phase (24+ h). In the establishment phase, growth  
733 in both height and radius is linear, as cells predominantly divide in the active growing region  
734 consisting of a thin disk at the bottom of the colony of approximate height  $H_{\text{AGL}} = 10 \mu\text{m}$ . During  
735 the flattening phase, radial growth is still linear while the increase in height slows.

736 In our case, the observed pattern in both the NQS and QS colony is driven by diffusive  
737 signals. Since the size the colony is much smaller than the characteristic length scale of signal  
738 diffusion during the experiments, details quantitative description on how the colony grows  
739 vertically do not matter much. Therefore, for simplicity we assume that the colony expands  
740 linearly in both radius and height, with a thin actively growing layer on the bottom. These  
741 assumptions together imply a fixed aspect ratio in colony height vs radius. In our simulation, the  
742 continuous growth of the colony is discretized by adding slabs of uniform heights and linearly  
743 increasing radius every unit time. In particular, in experiment the radius of the colony by the end  
744 of 100 hours is approximately 4 mm, giving a linear radius growth rate of  $v_r = 40 \mu\text{m}/\text{h}$ .  
745 Moreover, the cross-sectional images of the colony show that at different times of colony  
746 expansion, the height to radius ratio ranges from 1: 7 to 1: 12. For simplicity, we assume a fixed  
747 ratio of the height to base in the triangular slice to be 1: 10, which leads to a linear height growth  
748 rate of  $v_h = 4 \mu\text{m}/\text{h}$ .

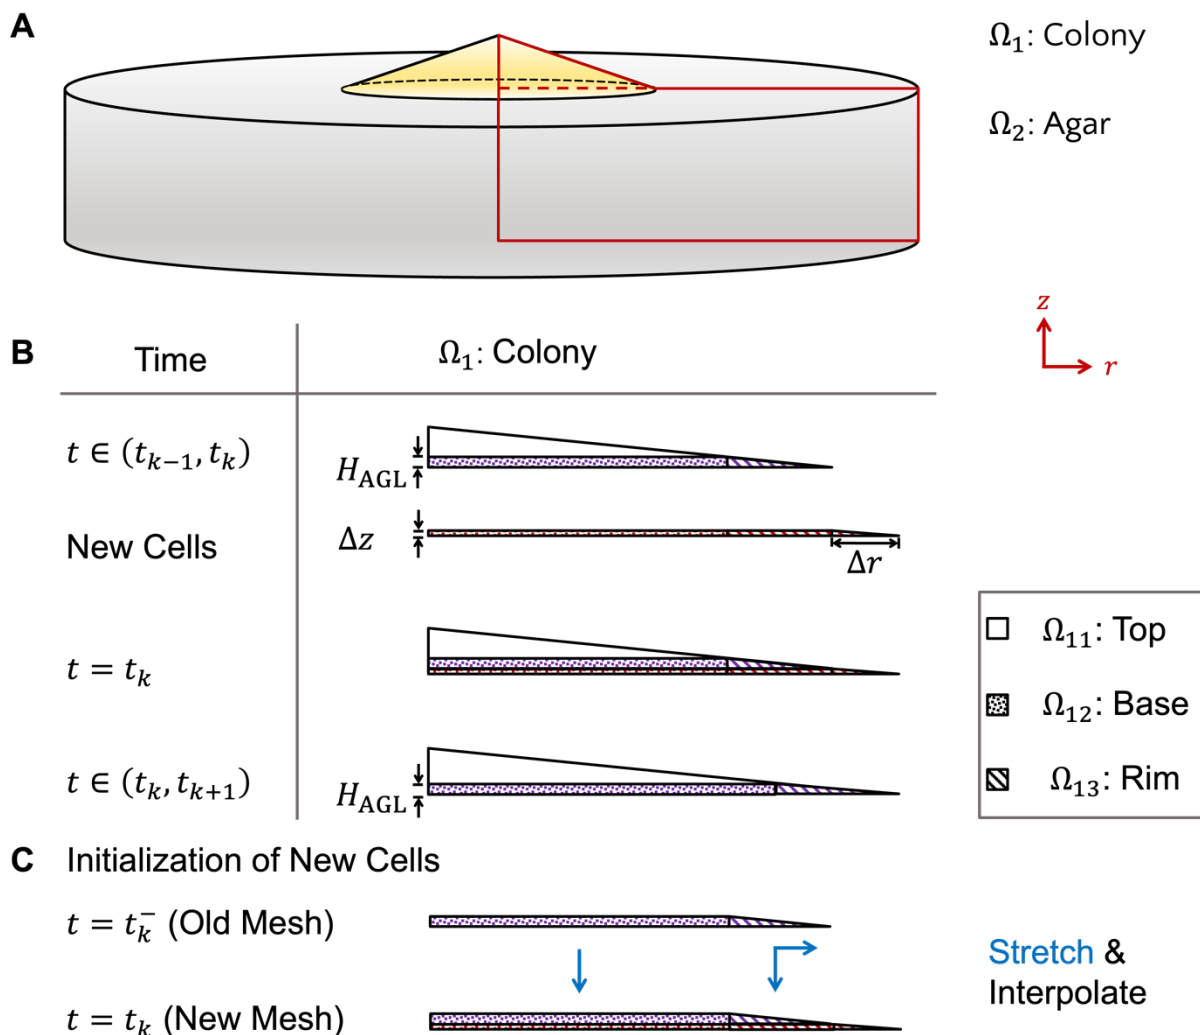

749

750

751 **Supplement Figure 7: Schematics of the 3D domain and the discretization of the colony expansion used in**

752 **numerical simulations. A)** We assume a cone shaped growing colony sits on top of the cylindrical agar pad. The

753 red curves outline a 2D slice from the 3D domain, in the radial ( $r$ ) and height ( $z$ ) direction. Assuming radial symmetry,

754 which is consistent with experimental observations, we used this 2D slice as the domain for the model. The solid line

755 represents the outer boundary ( $\partial\Omega$ ) while the dashed line represents the inner boundary ( $\partial\Omega^{\text{in}}$ ). **B)** Growth is

756 modeled by updating the colony's shape at even increments in time,  $\Delta t$ . At the end of each subinterval, the domain of

757 the colony,  $\Omega_1$ , is increased by adding a rectangle of height  $\Delta z$  and of width equal to that of the colony, and an

758 adjoining right triangle of height  $\Delta z$  with base  $\Delta r$ . Here, we discretize time into intervals  $(t_{k-1}, t_k)$ , with  $t_k = k \cdot \Delta t$ . **C)**

759 After every increment of time, a new mesh is generated for the expanded colony. The new nodes at the Top and Rim

760 region are initialized by interpolating the solution of the corresponding region from the stretched old mesh.

761

762 As shown in Fig. S7B, based on growth assumption at different locations, we divide the

763 colony subdomain  $\Omega_1$  into three different regions, top ( $\Omega_{11}$ ), base ( $\Omega_{12}$ ), and rim ( $\Omega_{13}$ ). In

764 particular, the triangular top, defined as  $\Omega_{11} = \{(r, z) \in \Omega_1 | z \geq H_{\text{AGL}}\}$ , doesn't grow. Let  $R_k$

765 represents the radial length of the colony at the end of time intervals  $(t_{k-1}, t_k)$ . The rectangular  
 766 base, defined as  $\Omega_{12} = \{(r, z) \in \Omega_1 | r \leq R_k, z \leq H_{AGL}\}$ , grows linearly only in the vertical  
 767 direction. The triangular rim, defined as  $\Omega_{13} = \{(r, z) \in \Omega_1 | r \geq R_k\}$ , grows linearly in both the  
 768 vertical and radial direction.

769 Let  $T$  be the time it takes for the colony to grow  $H_{AGL}$  in the vertical direction. Here,  $T =$   
 770  $H_{AGL}/v_h = 150 \text{ min}$ . Let  $S_k^{12}$  represents the area of the top region,  $\Omega_{12}$ , at the end of time interval  
 771  $(t_{k-1}, t_k)$ , where  $S_k^{12} = H_{AGL}R_k$ . Then we have that

$$772 \quad \frac{S_{k+1}^{12} - S_k^{12}}{\Delta t} = \frac{\Delta H}{\Delta t} R_k = \frac{H_{AGL}}{T} R_k = \frac{1}{T} S_k^{12}.$$

773 Similarly, let  $S_k^{13}$  represents the area of the rim region,  $\Omega_{13}$ , at the end of time interval  $(t_{k-1}, t_k)$ ,  
 774 where  $S_k^{13} = \kappa H_{AGL}^2/2$ , with  $\kappa$  represent the fixed radius-height ratio of the colony. Then we have

$$775 \quad \frac{S_{k+1}^{13} - S_k^{13}}{\Delta t} = \frac{\Delta H}{\Delta t} \kappa \left( H_{AGL} + \frac{1}{2} \Delta H \right) = \frac{H_{AGL}}{T} \kappa \left( H_{AGL} + \frac{1}{2} \Delta H \right) = \frac{2}{T} S_k^{13} + O(\Delta H).$$

776 Therefore, we can approximate the expansion factor of the rim region,  $\Omega_{13}$ , by  $2/T$ , which is  
 777 twice as fast as the expansion rate base region,  $\Omega_{12}$ . Let  $\gamma_d = 1/T$ , we then get that the  
 778 following chemical dilution rate from colony expansion in the different regions,

$$779 \quad \gamma_d(X) = \begin{cases} 0, & X \in \Omega_{11}; \\ \gamma_d, & X \in \Omega_{12}; \\ 2\gamma_d, & X \in \Omega_{13}. \end{cases}$$

780

## 781 2. PDE Model

782 Let  $u(X, t)$  represent the aTc concentration at time  $t$  and location  $X \in \Omega$ . The inducer, aTc, is  
 783 initially supplied in the agar, which then diffuses into the colony and react with TetR in different  
 784 cells. The reaction occurring within the cells in the colony can be modeled using Eqs. (4c, d).

785 We assume that when the aTc-TetR complex,  $\hat{Y}$ , is being degraded by the enzyme ClpXP, and  
 786 that a portion  $\alpha \in [0,1]$  of the aTc returns to the cell from the complex (Nevozhay et al., 2009).

787 That is,

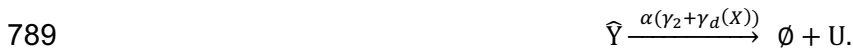

790 Putting everything together, for the concentrations of,

791  $x: [\text{Lacl}]; y_f: [\text{free TetR}]; y_b: [\text{bound TetR}]; g: [\text{C14}]; h: [\text{C4}]; u: [\text{aTc}],$

792 with  $y = y_f + y_b$ , and the superscript represent different subdomain, we obtain a diffusion-  
 793 reaction model we describe next.

794 In the colony domain,  $X \in \Omega_1$ , the various concentrations evolve according to,

$$795 \quad \frac{\partial x}{\partial t} = a_1 \eta_1(y_f) \phi_1(g) - (\gamma_1 + \gamma(X))x, \quad (9a)$$

$$796 \quad \frac{\partial y}{\partial t} = a_2 \eta_2(x) \phi_2(h) - (\gamma_2 + \gamma(X))y, \quad (9b)$$

$$797 \quad \frac{\partial y_b}{\partial t} = k_{2+} u^c y_f - k_{2-} y_b - (\gamma_2 + \gamma(X))y_b, \quad (9c)$$

$$798 \quad \frac{\partial g^c}{\partial t} = D_1^c \Delta g^c + a_3 \beta_1 + a_3 (1 - \beta_3) \eta_1(y_f) - (\gamma_3 + \gamma(X))g^c, \quad (9d)$$

$$799 \quad \frac{\partial h^c}{\partial t} = D_2^c \Delta h^c + a_4 \beta_4 + a_4 (1 - \beta_4) \eta_2(x) - (\gamma_4 + \gamma(X))h^c, \quad (9e)$$

$$801 \quad \frac{\partial u^c}{\partial t} = D_3^c \Delta u^c - k_{2+} u^c y_f + k_{2-} y_b + \alpha (\gamma_2 + \gamma_d(X)) y_b - (\gamma_5 + \gamma(X))u^c. \quad (9f)$$

800 In the agar domain,  $\Omega_2$ , we have

$$802 \quad \frac{\partial g^a}{\partial t} = D_1^a \Delta g^a - \gamma_3 g^a, \quad (9g)$$

$$803 \quad \frac{\partial h^a}{\partial t} = D_2^a \Delta h^a - \gamma_4 h^a, \quad (9h)$$

$$804 \quad \frac{\partial u^a}{\partial t} = D_3^a \Delta u^a - \gamma_5 u^a. \quad (9i)$$

805 Here  $D_i^a$  denotes the signal diffusion coefficient in agar, for different chemicals C14, C4  
 806 and aTc indexed by  $i = 1, 2, 3$  respectively. Due to the crowdedness of the colony, we assume that  
 807 signal diffusion coefficients in the colony,  $D_i^c$ , satisfies  $D_i^c < D_i^a$ . In particular, it has been shown  
 808 that GFP diffuse 10 times faster in water ( $D_{\text{GFP}}^{\text{aqua}} \approx 87 \mu\text{m}^2/\text{s}$ ) (Swaminathan et al., 1997), compared  
 809 with in the cytoplasm ( $D_{\text{GFP}}^{\text{cyto}} \approx 8 \mu\text{m}^2/\text{s}$ ) (Elf et al., 2007). Therefore, we set  $D_i^a = 10 D_i^c$ . Since aTc  
 810 has a lower molecular weight than GFP, we assume that the aTc diffusion coefficient in agar is  
 811  $D_1^a = 400 \mu\text{m}^2/\text{s}$ . It has been reported that the effective diffusion coefficients of C14 and C4 are  
 812  $D_{\text{C14}} \approx 83 \mu\text{m}^2/\text{s}$  and  $D_{\text{C4}} \approx 1810 \mu\text{m}^2/\text{s}$  (Karig et al., 2018). Here we set the diffusion coefficients  
 813 in agar to  $D_2^a = 10^2 \mu\text{m}^2/\text{s}$  and  $D_3^a = 10^3 \mu\text{m}^2/\text{s}$ , for C14 and C4, respectively.  
 814 For the diffusible chemicals,  $C = g, h$ , or  $u$ , we also we the following inner and outer boundary  
 815 conditions.

$$816 \quad C^a(X, t)|_{X \in \partial \Omega^{\text{in}}} = C^c(X, t)|_{X \in \partial \Omega^{\text{in}}}, \quad (9j)$$

$$817 \quad \mathbf{n} \cdot D_i^a \nabla C^a(X, t)|_{X \in \partial \Omega^{\text{in}}} = -\mathbf{n} \cdot D_i^c \nabla C^c(X, t)|_{X \in \partial \Omega^{\text{in}}}, \quad (9k)$$

$$818 \quad \mathbf{n} \cdot D_i^{a/c} \nabla C^{a/c}(X, t)|_{X \in \partial \Omega} = 0. \quad (9l)$$

819 We used the radial symmetry of the 3D domain to reduce it to an equivalent 2D model.  
 820 Let  $r$  and  $z$  represent the independent variables denotes the radius and height coordinate inside  
 821 the colony. We then have that the Laplacian operator acts on  $C = g, h$ , or  $u$  as



822

$$\Delta C = \frac{1}{r} \frac{\partial}{\partial r} \left( r \frac{\partial C}{\partial r} \right) + \frac{\partial C}{\partial z}.$$

823

## 824 Parameters and Simulation

825 We assume the tagged degradation gives a half-life of 7 min for intercellular species (Chen et  
826 al., 2015). This leads to degradation rates of LacI and TetR of  $\gamma = \gamma_1 = \gamma_2 = \ln(2) / 7 \text{ min}^{-1}$ . It  
827 has been reported that the degradation rate of AHL ranges from zero (no detectable  
828 degradation at 32 hours) to a half-life of 8 hours depending on environmental factors such as  
829 temperature and pH value (Politi et al., 2014). For our experimental condition, we assume that  
830 the half-life of C14 and C4 is 24 hours, corresponding to degradation rates of  $\gamma_3 = \gamma_4 =$   
831  $\ln(2) / 24 \text{ h}^{-1}$ . The production rates of each species,  $a_i$ , with  $i = 1, \dots, 4$  along with their  
832 corresponding threshold of activation (EC50)/repression (IC50) parameters  $\theta_j$ , with  $j =$   
833  $\{x, y, g, h\}$ , were chosen so that the nondimensionalized parameters,  $\tilde{a}_i$ , give a match with  
834 experimentally observed patterns. We also set the basal production level of the AHL signals to  
835  $\beta_1 = 0.2$  and  $\beta_1 = 0.5$ , for C14 and C4 respectively. It has been reported that aTc bind with TetR  
836 at rate,  $k_+ = 0.06/\text{nM}/\text{min}$  (Nevozhay et al., 2009). As shown in Fig 1E and G, aTc can induce  
837 the yellow state at a concentration of 1 ng/ml in the NQS, and at approximately 10 ng/ml in the  
838 QS case. Therefore, we set  $k_+ = k \cdot 0.06 \text{ nM}^{-1}\text{min}^{-1}$ , with  $k = 1$  in the NQS case and  $k = 10$  in  
839 the QS case. We set the unbinding rate to  $k_- = k_+/k_A$ , with association constant  $k_A = 10 \text{ nM}^{-1}$   
840 (Kintrup et al., 2000). When the aTc-TetR complex is degraded by ClpXP, we assume that  $\alpha =$   
841 0.8 portion of the aTc in the complex returns back to the cell. All parameters used in Figure  
842 7C,D are the same as those used in Figure 7B except the following: in Figure 7C, a pulse of  $\gamma =$   
843  $\ln(2) / 5.178 \text{ min}^{-1}$  between  $t = 23.25 \text{ hr}$  and  $t = 25.575 \text{ hr}$  is applied; in Figure 7D, repressor  
844 strengths are reduced to  $a_1 = 80 \text{ nM}/\text{min}$  and  $a_2 = 120 \text{ nM}/\text{min}$ .

845 We simulate the PDE-ODE model, described by Eqs. (9) using MATLAB. To reduce  
846 interpolation error, we took the following approach: First, over  $\delta t = 1\text{min}$  time intervals, the  
847 PDEs were solved using the Partial Differential Equation Toolbox and the ODEs were solved  
848 using ode15s at each mesh point, using the solution from the previous time step as initial  
849 conditions. Second, the mesh for subdomain  $\Omega_{11}$ , the top of the colony, was kept the same  
850 between each update of the colony size at every  $\Delta t = 15 \text{ min}$ . Meanwhile, at each colony  
851 growth update time point  $t = t_k$ , as shown in Figure S1B, mesh points in the bottom layer ( $\Omega_{12}$   
852 and  $\Omega_{13}$ ) were initialized by interpolating the solution at  $t = t_k^-$  with the coordinates of the mesh  
853 points linearly stretched, as shown in Figure S1C.

854

855 **Supplemental information titles and legends**

856 **Supplemental Figure 1: Individual behavior of QS and NQS toggle cells when treated with**  
857 **a single inducer for different duration of times.** Flow cytometry data of QS and NQS toggle  
858 cells that were pre-induced with either IPTG or aTc. Each dot is a single cell classified within a  
859 gate. Gates were determined with single color and double negative controls. Dashed lines in each  
860 plot represent the boundaries between the three distinct gates, which represent cellular states:  
861 CFP+ (top gate), YFP+ (bottom-right gate), and OFF (bottom-left gate). Background colors in  
862 each plot represent which state the majority of cells are in (>50%): blue color indicates mostly  
863 CFP+ cells, yellow plots are mostly YFP+, gray plots are mostly OFF, and white plots indicate  
864 cells that are present in multiple states (<50% each). **A)** QS toggle cells pre-treated with IPTG  
865 and aTc after growth for 3 (top), 9 (middle), and 12 hours (bottom). **B)** NQS toggle cells pre-  
866 treated with IPTG and aTc after growth for 3 (top) and 9 hours (bottom) (see Fig. 2).

867  
868 **Supplemental Figure 2: Induction curves of circuit variations of the QS toggle.** We obtained  
869 the Weaker Blue State by using lower strength promoters for *tetR* and *cfp* genes. We obtained  
870 the Weaker QS toggle by using lower strength promoters for the circuit genes, except both QS  
871 genes which were kept the same. We obtained the Inverted QS toggle by using the same lower  
872 strength promoters but reversing the QS network connected to each state: now, the rhIR/I network  
873 activates the yellow state, and cinR/I the blue state. **A, B)** Induction curves of Weaker Blue State  
874 QS toggle with IPTG (A) and aTc (B) in liquid culture. **C, D)** Induction curves of Weaker QS toggle  
875 with IPTG (C) and aTc (D) in liquid culture. **E, F)** Induction curves of Weaker QS toggle with IPTG  
876 (E) and aTc (F) in liquid culture, in which cells were pre-treated with IPTG. **G, H)** Induction curves  
877 of weaker QS toggle with IPTG (G) and aTc (H) in liquid culture, in which cells were pre-treated  
878 with aTc. **I, J)** Induction curves of Inverted QS toggle with IPTG (I) and aTc (J) in liquid culture.  
879 Lines represent the average fluorescence and error bars represent the standard deviation of 3  
880 technical replicates for at least 3 independent experiments (see Fig. 1).

881  
882 **Supplemental Figure 3: Incubation at 37°C causes aTc degradation.** **A)** Yellow ring width  
883 measured from QS toggle colonies grown in aTc plates pre-incubated either at 4°C or 37°C for  
884 48 hours prior to plating. Then, we plated and grew cells as shown in Fig. 3A. These values  
885 represent yellow ring widths from 76h post-plating. The 37°C plates showed a significant decrease  
886 in width in comparison to its 4°C counterparts, except at 12.5 ng/ml (\* $p < 0.01$ , Mann-Whitney  
887 non-parametric test). Data is from 5 independent experiments. Pre-4°C colonies are included in  
888 Fig. 3B. **B)** ATc quantification from LB agar extracts (in the absence of cells) with an HPLC. At

889 time 0, aTc was quantified before any incubation. Samples were divided in two groups: pre-  
890 incubation for 48 hours at 37°C (bright blue), or 4°C (light blue) to recreate the experimental  
891 timeline in (A). On day 2, we incubated both groups at 37°C until day 6 to also recapitulate the  
892 experimental setup. As a control (gray), LB agar + aTc samples were kept at 4°C throughout the  
893 entire test and measured on day 7. Data represents mean  $\pm$  standard deviation of 3 independent  
894 experiments (see Fig. 3).

895

896 **Supplemental Figure 4: Quantification of pixel overlap for QS toggle (light gray) and NQS**  
897 **toggle (dark gray) colonies without single color data.** We selected only colonies that have  
898 both colors present for at least 25% of the radius. We normalized the number of overlapping pixels  
899 by the colony radius (total pixels) ( $p < 0.01$ , Mann-Whitney non-parametric test). Data for each  
900 QS toggle test contains over 138 colonies from at least 11 independent experiments, while data  
901 for each NQS test contains at least 5 colonies from 2 independent experiments (see Fig. 4).

902

903 **Supplemental Figure 5: Multiple blue rings are also observed in LB agar QS colonies. A)**  
904 Example of colony obtained from a 50 ng/ml aTc plate, over time. **B, C)** Fluorescence intensity  
905 cross-section at 52h and 76h, respectively, shown in (A). Curves are the average fluorescence  
906 between 4 radii of the same colony. **D, E)** We plotted each colony pixel from the images at 52h  
907 and 76h, respectively, for both normalized fluorescence values. We classified pixels as  
908 overlapping when both normalized fluorescence values were above a threshold of 0.3 (inside the  
909 gray boxed region). Curves are the average fluorescence between 4 radii of the same colony. **F)**  
910 Example of imperfectly symmetrical internal blue rings from a different colony at 52 hours post-  
911 plating (see Fig. 7).

912

913 **Supplemental Figure 6: Expanding QS colonies in EZ rich defined medium. A)** Colonies  
914 obtained from plates with different aTc concentrations, over time. At 100 ng/ml aTc, colonies  
915 remained all yellow or with blue center or internal ring fragments. **B)** We used the measurement  
916 of color overlap to quantify the spatial segregation of states per colony. We classified pixels as  
917 overlapping when both normalized fluorescence values were above a threshold of 0.3.  
918 Measurement of overlap was normalized by the colony radius (total number of pixels). Data is  
919 from 2 independent experiments. **C)** Fluorescence intensity cross-sectionals of colonies shown in  
920 (A). Curves are the average fluorescence between 4 radii of the same colony (see Fig. 7).

921

922 **Supplement Figure 7: Schematics of the 3D domain and the discretization of the colony**  
923 **expansion used in numerical simulations. A)** We assume a cone shaped growing colony sits  
924 on top of the cylindrical agar pad. The red curves outline a 2D slice from the 3D domain, in the  
925 radial ( $r$ ) and height ( $z$ ) direction. Assuming radial symmetry, which is consistent with  
926 experimental observations, we used this 2D slice as the domain for the model. The solid line  
927 represents the outer boundary ( $\partial\Omega$ ) while the dashed line represents the inner boundary ( $\partial\Omega^{\text{in}}$ ).  
928 **B)** Growth is modeled by updating the colony's shape at even increments in time,  $\Delta t$ . At the end  
929 of each subinterval, the domain of the colony,  $\Omega_1$ , is increased by adding a rectangle of height  
930  $\Delta z$  and of width equal to that of the colony, and an adjoining right triangle of height  $\Delta z$  with base  
931  $\Delta r$ . Here, we discretize time into intervals  $(t_{k-1}, t_k)$ , with  $t_k = k \cdot \Delta t$ . **C)** After every increment of  
932 time, a new mesh is generated for the expanded colony. The new nodes at the Top and Rim  
933 region are initialized by interpolating the solution of the corresponding region from the stretched  
934 old mesh (see Fig. 5).

935

936 **Supplement Movie 1: Patterning in the expanding NQS toggle colony.** Once aTc drops  
937 below the hysteresis point, cells from the top start to switch to the blue state. Sequestration and  
938 degradation of aTc leads to the further spreading of the blue wave. Top: aTc profile at different  
939 locations of the colony. Middle: 2D colormap of the LacI and TetR profile at different locations of  
940 the colony. Bottom three panels on left: normalized LacI and TetR concentration in the top-down  
941 view of the colony. Bottom right: Evolution of the effective promoter strength at the top and rim  
942 of the colony.

943

944 **Supplement Movie 2: Patterning in the expanding QS toggle colony.** Faster growth and  
945 balance of the QS signals at the rim leads to cells switching to the blue state. Bistability in the  
946 non-growing top leads to preservation of the yellow/blue states, as new cells are pushed out of  
947 the actively growing layer. This leads to a stable switching boundary in the radial direction. Top:  
948 aTc profile at different locations of the colony. Middle: 2D colormap of the LacI and TetR profile  
949 at different locations of the colony. Bottom three panels on left: normalized LacI and TetR  
950 concentration in the top-down view of the colony. Bottom right: Evolution of the effective  
951 promoter strength at the top and rim of the colony.

952

953

954

955

956 **References**

- 957 Alaynick, W. A., Jessell, T. M., & Pfaff, S. L. (2011). SnapShot: Spinal cord development. *Cell*,  
958 146(1), 178.e1-178.e1. <https://doi.org/10.1016/j.cell.2011.06.038>
- 959 Barbier, I., Perez-Carrasco, R., & Schaeferli, Y. (2020). Controlling spatiotemporal pattern  
960 formation in a concentration gradient with a synthetic toggle switch. *Molecular Systems*  
961 *Biology*, 16(6), 1–15. <https://doi.org/10.15252/msb.20199361>
- 962 Benner, S. A., & Sismour, A. M. (2005). Synthetic biology. *Nature Reviews Genetics*, 6(7), 533–  
963 543. <https://doi.org/10.1038/nrg1637>
- 964 Briscoe, J., & Small, S. (2015). Morphogen rules: Design principles of gradient-mediated  
965 embryo patterning. *Development (Cambridge)*, 142(23), 3996–4009.  
966 <https://doi.org/10.1242/dev.129452>
- 967 Cachat, E., Liu, W., & Davies, J. A. (2017). Synthetic self-patterning and morphogenesis in  
968 mammalian cells: a proof-of-concept step towards synthetic tissue development.  
969 *Engineering Biology*, 1(2), 71–76. <https://doi.org/10.1049/enb.2017.0013>
- 970 Callura, J. M., Cantor, C. R., & Collins, J. J. (2012). Genetic switchboard for synthetic biology  
971 applications. *Proceedings of the National Academy of Sciences of the United States of*  
972 *America*, 109(15), 5850–5855. <https://doi.org/10.1073/pnas.1203808109>
- 973 Cameron, D. E., Bashor, C. J., & Collins, J. J. (2014). A brief history of synthetic biology. *Nature*  
974 *Reviews Microbiology*, 12(5), 381–390. <https://doi.org/10.1038/nrmicro3239>
- 975 Cao, Y., Ryser, M. D., Payne, S., Li, B., Rao, C. V., & You, L. (2016a). Collective Space-  
976 Sensing Coordinates Pattern Scaling in Engineered Bacteria. *Cell*, 165(3), 620–630.  
977 <https://doi.org/10.1016/j.cell.2016.03.006>
- 978 Cao, Y., Ryser, M. D., Payne, S., Li, B., Rao, C. v., & You, L. (2016b). Collective Space-Sensing  
979 Coordinates Pattern Scaling in Engineered Bacteria. *Cell*, 165(3), 620–630.  
980 <https://doi.org/10.1016/j.cell.2016.03.006>
- 981 Chen, Y., Kim, J. K., Hirning, A. J., Josić, K., & Bennett, M. R. (2015). Emergent genetic  
982 oscillations in a synthetic microbial consortium. *Science*, 349(6251), 986–989.  
983 <https://doi.org/10.1126/science.aaa3794>
- 984 Cheng, A. A., & Lu, T. K. (2012). Synthetic Biology An emerging engineering discipline. *Annual*  
985 *Review of Biomedical Engineering*, 14(April), 155–178. <https://doi.org/10.1146/annurev-bioeng-071811>
- 987 Church, G. M., Elowitz, M. B., Smolke, C. D., Voigt, C. A., & Weiss, R. (2014). Realizing the  
988 potential of synthetic biology. *Nature Reviews Molecular Cell Biology*, 15(4), 289–294.  
989 <https://doi.org/10.1038/nrm3767>
- 990 Curatolo, A. I., Zhou, N., Zhao, Y., Liu, C., Daerr, A., TAILLEUR, J., & Huang, J. (2020).  
991 Cooperative pattern formation in multi-component bacterial systems through reciprocal  
992 motility regulation. *Nature Physics*, 16(11), 1152–1157. <https://doi.org/10.1038/s41567-020-0964-z>
- 994 Davies, J. A., & Glykofrydis, F. (2020). Engineering pattern formation and morphogenesis.  
995 *Biochemical Society Transactions*, 48(3), 1177–1185.  
996 <https://doi.org/10.1042/BST20200013>
- 997 Dessaud, E., McMahon, A. P., & Briscoe, J. (2008). Pattern formation in the vertebrate neural  
998 tube: A sonic hedgehog morphogen-regulated transcriptional network. *Development*,  
999 135(15), 2489–2503. <https://doi.org/10.1242/dev.009324>

- 1000 Diambra, L., Senthivel, V. R., Menendez, D. B., & Isalan, M. (2015). Cooperativity to increase  
1001 turing pattern space for synthetic biology. *ACS Synthetic Biology*, 4(2), 177–186.  
1002 <https://doi.org/10.1021/sb500233u>
- 1003 Elf, J., Li, G.-W., & Xie, X. S. (2007). Probing Transcription Factor Dynamics at the Single-  
1004 Molecule Level in a Living Cell. *Science*, 316(5828), 1191–1194.  
1005 <https://doi.org/10.1126/science.1141967>
- 1006 Gardner, T. S., Cantor, C. R., & Collins, J. J. (2000a). Construction of a genetic toggle switch in  
1007 *Escherichia coli*. *Nature*, 403(6767), 339–342. <https://doi.org/10.1038/35002131>
- 1008 Gardner, T. S., Cantor, C. R., & Collins, J. J. (2000b). Construction of a genetic toggle switch in  
1009 *Escherichia coli*. In *NATURE* (Vol. 403). [www.nature.com](http://www.nature.com)
- 1010 Grant, P. K., Szep, G., Patange, O., Halatek, J., Coppard, V., Csikász-Nagy, A., Haseloff, J.,  
1011 Locke, J. C. W., Dalchau, N., & Phillips, A. (2020). Interpretation of morphogen gradients  
1012 by a synthetic bistable circuit. *Nature Communications*, 11(1), 1–8.  
1013 <https://doi.org/10.1038/s41467-020-19098-w>
- 1014 Halling-Sørensen, B., Sengeløv, G., & Tjørnelund, J. (2002). Toxicity of tetracyclines and  
1015 tetracycline degradation products to environmentally relevant bacteria, including selected  
1016 tetracycline-resistant bacteria. *Archives of Environmental Contamination and Toxicology*,  
1017 42(3), 263–271. <https://doi.org/10.1007/s00244-001-0017-2>
- 1018 Karig, D., Michael Martini, K., Lu, T., DeLateur, N. A., Goldenfeld, N., & Weiss, R. (2018a).  
1019 Stochastic Turing patterns in a synthetic bacterial population. *Proceedings of the National*  
1020 *Academy of Sciences of the United States of America*, 115(26), 6572–6577.  
1021 <https://doi.org/10.1073/pnas.1720770115>
- 1022 Karig, D., Michael Martini, K., Lu, T., DeLateur, N. A., Goldenfeld, N., & Weiss, R. (2018b).  
1023 Stochastic Turing patterns in a synthetic bacterial population. *Proceedings of the National*  
1024 *Academy of Sciences of the United States of America*, 115(26), 6572–6577.  
1025 <https://doi.org/10.1073/pnas.1720770115>
- 1026 Khalil, A. S., & Collins, J. J. (2010). Synthetic biology: Applications come of age. *Nature*  
1027 *Reviews Genetics*, 11(5), 367–379. <https://doi.org/10.1038/nrg2775>
- 1028 Kim, H., Jin, X., Glass, D. S., & Riedel-Kruse, I. H. (2020). Engineering and modeling of  
1029 multicellular morphologies and patterns. *Current Opinion in Genetics and Development*,  
1030 63(Figure 1), 95–102. <https://doi.org/10.1016/j.gde.2020.05.039>
- 1031 Kintrup, M., Schubert, P., Kunz, M., Chabbert, M., Alberti, P., Bombarda, E., Schneider, S., &  
1032 Hillen, W. (2000). Trp scanning analysis of Tet repressor reveals conformational changes  
1033 associated with operator and anhydrotetracycline binding. *European Journal of*  
1034 *Biochemistry*, 267(3), 821–829. <https://doi.org/10.1046/j.1432-1327.2000.01063.x>
- 1035 Kuznetsov, Y. A. (2004). *Elements of Applied Bifurcation Theory* (Vol. 112). Springer New York.  
1036 <https://doi.org/10.1007/978-1-4757-3978-7>
- 1037 Lithgow, J. K., Wilkinson, A., Hardman, A., Rodelas, B., Wisniewski-Dyé, F., Williams, P., &  
1038 Downie, J. A. (2000). The regulatory locus *cinRI* in *Rhizobium leguminosarum* controls a  
1039 network of quorum-sensing loci. *Molecular Microbiology*, 37(1), 81–97.  
1040 <https://doi.org/10.1046/j.1365-2958.2000.01960.x>
- 1041 Liu, C., Fu, X., Liu, L., Ren, X., Chau, C. K. L., Li, S., Xiang, L., Zeng, H., Chen, G., Tang, L.-H.,  
1042 Lenz, P., Cui, X., Huang, W., Hwa, T., & Huang, J.-D. (2011). Sequential Establishment of

- 1043 Stripe Patterns in an Expanding Cell Population Chenli. *Science*, 334(October), 238–242.  
1044 <https://doi.org/10.7551/mitpress/8876.003.0036>
- 1045 Lugagne, J. B., Sosa Carrillo, S., Kirch, M., Köhler, A., Batt, G., & Hersen, P. (2017). Balancing  
1046 a genetic toggle switch by real-time feedback control and periodic forcing. *Nature*  
1047 *Communications*, 8(1), 1–7. <https://doi.org/10.1038/s41467-017-01498-0>
- 1048 McCarty, N. S., & Ledesma-Amaro, R. (2019). Synthetic Biology Tools to Engineer Microbial  
1049 Communities for Biotechnology. *Trends in Biotechnology*, 37(2), 181–197.  
1050 <https://doi.org/10.1016/j.tibtech.2018.11.002>
- 1051 Nasiadka, A., Dietrich, B. H., & Krause, H. M. (2002). Anterior-posterior patterning in the  
1052 *Drosophila* embryo. *Advances in Developmental Biology and Biochemistry*, 12(C), 155–  
1053 204. [https://doi.org/10.1016/S1569-1799\(02\)12027-2](https://doi.org/10.1016/S1569-1799(02)12027-2)
- 1054 Nevozhay, D., Adams, R. M., Murphy, K. F., Josić, K., & Balázs, G. (2009). Negative  
1055 autoregulation linearizes the dose–response and suppresses the heterogeneity of gene  
1056 expression. *Proceedings of the National Academy of Sciences*, 106(13), 5123–5128.  
1057 <https://doi.org/10.1073/pnas.0809901106>
- 1058 Nikolaev, E. V., & Sontag, E. D. (2016). Quorum-Sensing Synchronization of Synthetic Toggle  
1059 Switches: A Design Based on Monotone Dynamical Systems Theory. *PLoS Computational*  
1060 *Biology*, 12(4). <https://doi.org/10.1371/journal.pcbi.1004881>
- 1061 Nordholt, N., van Heerden, J., Kort, R., & Bruggeman, F. J. (2017). Effects of growth rate and  
1062 promoter activity on single-cell protein expression. *Scientific Reports*, 7(1).  
1063 <https://doi.org/10.1038/s41598-017-05871-3>
- 1064 Payne, S., Li, B., Cao, Y., Schaeffer, D., Ryser, M. D., & You, L. (2013). Temporal control of  
1065 self-organized pattern formation without morphogen gradients in bacteria. *Molecular*  
1066 *Systems Biology*, 9(1), 1–10. <https://doi.org/10.1038/msb.2013.55>
- 1067 Pesci, E. C., Pearson, J. P., Seed, P. C., & Iglewski, B. H. (1997). Regulation of las and rhl  
1068 quorum sensing in *Pseudomonas aeruginosa*. *Journal of Bacteriology*, 179(10), 3127–  
1069 3132. <https://doi.org/10.1128/jb.179.10.3127-3132.1997>
- 1070 Politi, N., Pasotti, L., Zucca, S., Casanova, M., Micoli, G., Cusella De Angelis, M. G., & Magni,  
1071 P. (2014). Half-life measurements of chemical inducers for recombinant gene expression.  
1072 *Journal of Biological Engineering*, 8(1). <https://doi.org/10.1186/1754-1611-8-5>
- 1073 Potvin-Trottier, L., Lord, N. D., Vinnicombe, G., & Paulsson, J. (2016). Synchronous long-term  
1074 oscillations in a synthetic gene circuit. *Nature*, 538(7626), 514–517.  
1075 <https://doi.org/10.1038/nature19841>
- 1076 Riglar, D. T., Richmond, D. L., Potvin-Trottier, L., Verdegaal, A. A., Naydich, A. D., Bakshi, S.,  
1077 Leoncini, E., Lyon, L. G., Paulsson, J., & Silver, P. A. (2019). Bacterial variability in the  
1078 mammalian gut captured by a single-cell synthetic oscillator. *Nature Communications*,  
1079 10(1). <https://doi.org/10.1038/s41467-019-12638-z>
- 1080 Santos-Moreno, J., & Schaeerli, Y. (2018). Using Synthetic Biology to Engineer Spatial Patterns.  
1081 *Advanced Biosystems*, 3(4), 1–15. <https://doi.org/10.1002/adbi.201800280>
- 1082 Sekine, R., Shibata, T., & Ebisuya, M. (2018). Synthetic mammalian pattern formation driven by  
1083 differential diffusivity of Nodal and Lefty. *Nature Communications*, 9(1), 1–11.  
1084 <https://doi.org/10.1038/s41467-018-07847-x>
- 1085 Struhl, G. (1989). Differing strategies for organizing anterior and posterior body pattern in  
1086 *Drosophila* embryos. *Nature*, 338(6218), 741–744. <https://doi.org/10.1038/338741a0>

- 1087 Swaminathan, R., Hoang, C. P., & Verkman, A. S. (1997). Photobleaching recovery and  
1088 anisotropy decay of green fluorescent protein GFP-S65T in solution and cells: Cytoplasmic  
1089 viscosity probed by green fluorescent protein translational and rotational diffusion.  
1090 *Biophysical Journal*, 72(4), 1900–1907. [https://doi.org/10.1016/S0006-3495\(97\)78835-0](https://doi.org/10.1016/S0006-3495(97)78835-0)  
1091 Turing, A. M. (1952). The chemical basis of morphogenesis. *Philosophical Transactions of the*  
1092 *Royal Society B: Biological Sciences*, 237(August), 37–72.  
1093 Wang, L., Walker, B. L., Iannaccone, S., Bhatt, D., Kennedy, P. J., & Tse, W. T. (2009). Bistable  
1094 switches control memory and plasticity in cellular differentiation. *Proceedings of the*  
1095 *National Academy of Sciences of the United States of America*, 106(16), 6638–6643.  
1096 <https://doi.org/10.1073/pnas.0806137106>  
1097 Warren, M. R., Sun, H., Yan, Y., Cremer, J., Li, B., & Hwa, T. (2019a). Spatiotemporal  
1098 establishment of dense bacterial colonies growing on hard agar. *ELife*, 8, 1–47.  
1099 <https://doi.org/10.7554/eLife.41093>  
1100 Warren, M. R., Sun, H., Yan, Y., Cremer, J., Li, B., & Hwa, T. (2019b). *Spatiotemporal*  
1101 *establishment of dense bacterial colonies growing on hard agar*.  
1102 <https://doi.org/10.7554/eLife.41093.001>  
1103 Weisenberger, M. S., & Deans, T. L. (2018). Bottom-up approaches in synthetic biology and  
1104 biomaterials for tissue engineering applications. *Journal of Industrial Microbiology and*  
1105 *Biotechnology*, 45(7), 599–614. <https://doi.org/10.1007/s10295-018-2027-3>  
1106 Wolpert, L. (1969). Positional information and the spatial pattern of cellular differentiation.  
1107 *Journal of Theoretical Biology*, 25(1), 1–47. [https://doi.org/10.1016/S0022-5193\(69\)80016-](https://doi.org/10.1016/S0022-5193(69)80016-0)  
1108 [0](https://doi.org/10.1016/S0022-5193(69)80016-0)  
1109 Xia, P. F., Ling, H., Foo, J. L., & Chang, M. W. (2019). Synthetic genetic circuits for  
1110 programmable biological functionalities. *Biotechnology Advances*, 37(6), 107393.  
1111 <https://doi.org/10.1016/j.biotechadv.2019.04.015>  
1112 Xiong, L., Cao, Y., Cooper, R., Rappel, W. J., Hasty, J., & Tsimring, L. (2020). Flower-like  
1113 patterns in multi-species bacterial colonies. *ELife*, 9. <https://doi.org/10.7554/eLife.48885>  
1114 Zong, D. M., Cinar, S., Shis, D. L., Josić, K., Ott, W., & Bennett, M. R. (2018). Predicting  
1115 Transcriptional Output of Synthetic Multi-input Promoters. *ACS Synthetic Biology*, 7(8),  
1116 1834–1843. <https://doi.org/10.1021/acssynbio.8b00165>  
1117
